# Supplementary material for: Identification of More Feasible MicroRNA–mRNA Interactions within Multiple Cancers Using Principal Component Analysis Based Unsupervised Feature Extraction
Source: PubMed Central journal article supplement (PMC4881522; doi:10.3390/ijms17050696), 2016-05-10
Supplement: ijms-17-00696-s001.pdf [file ijms-17-00696-s001.pdf]

# Supplementary Materials: Identification of More Feasible MicroRNA–mRNA Interactions within Multiple Cancers Using Principal Component Analysis Based Unsupervised Feature Extraction

Y-h. Taguchi

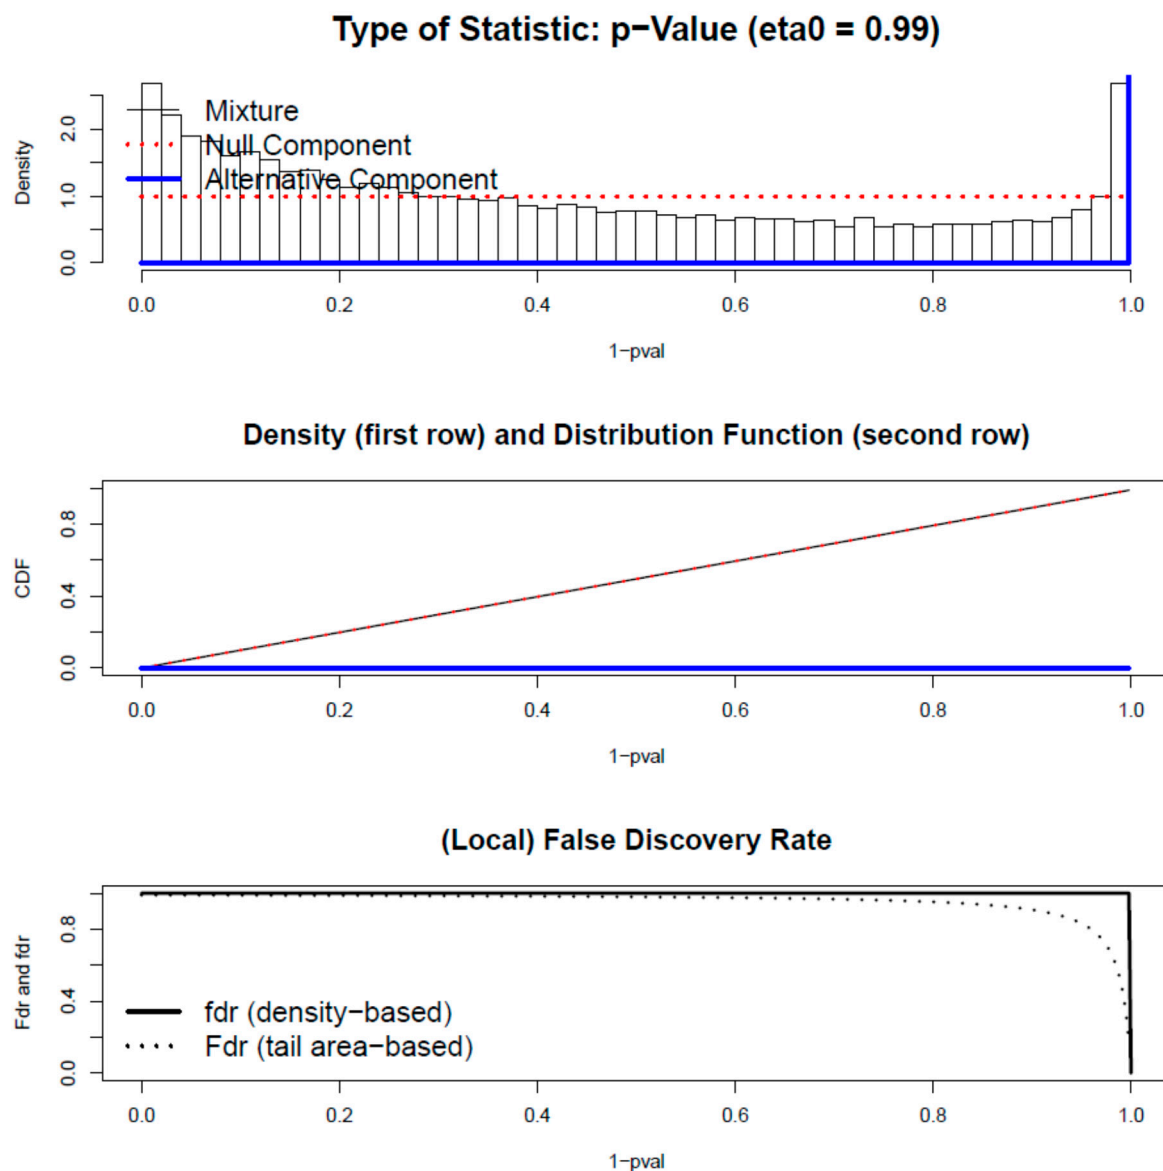

**Figure S1.** fdrtool’s output: mRNA in HCC. **Top:** histogram of 1-*P*; **Middle:** Density and cumulative density of 1-*P*; **Bottom:** (Local) False Discovery Rate.

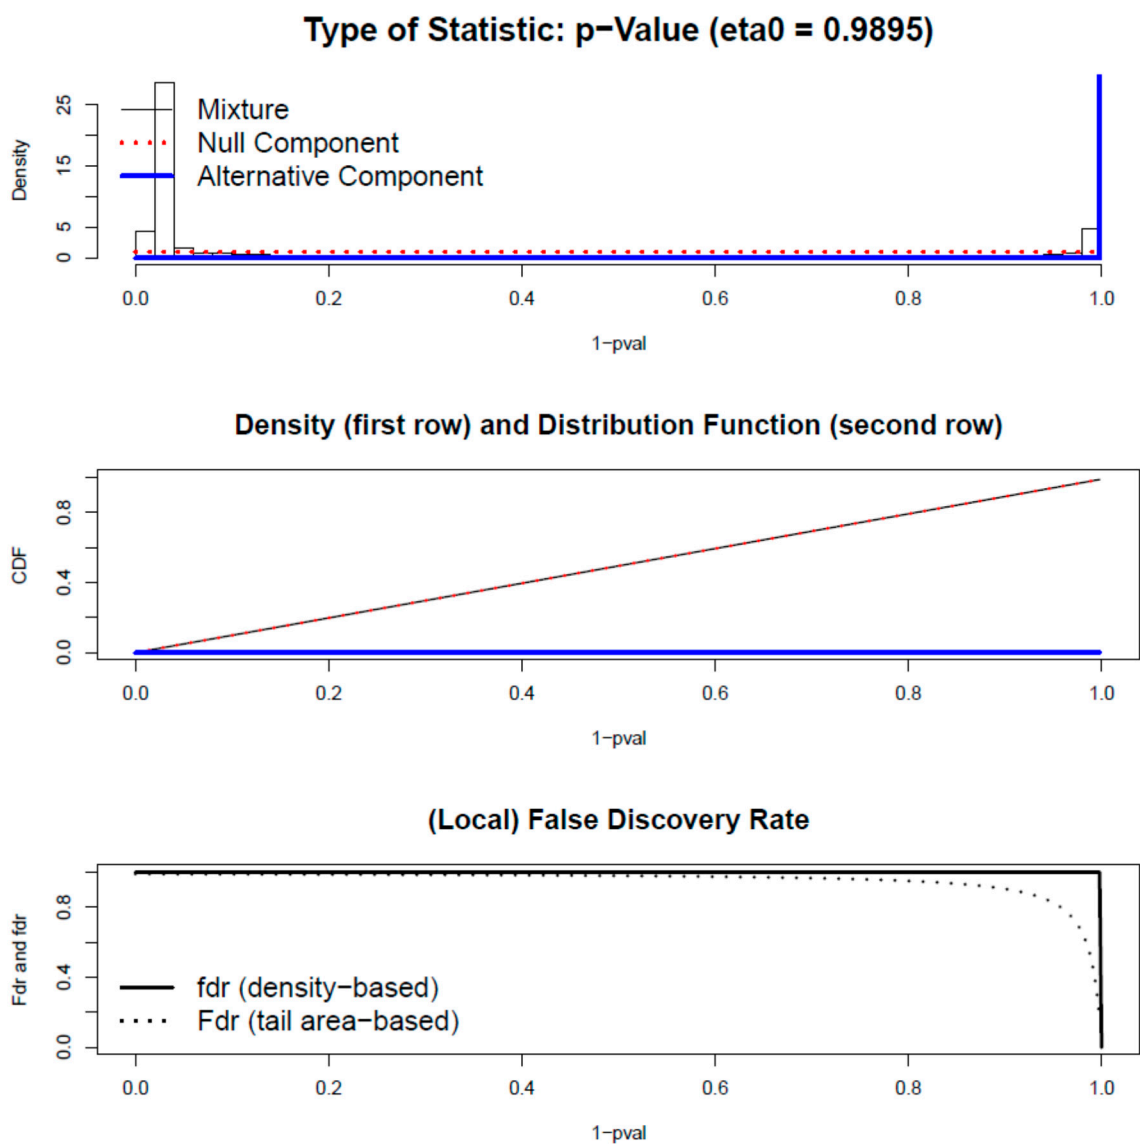

Figure S2. fdrtool's output: miRNA in HCC.

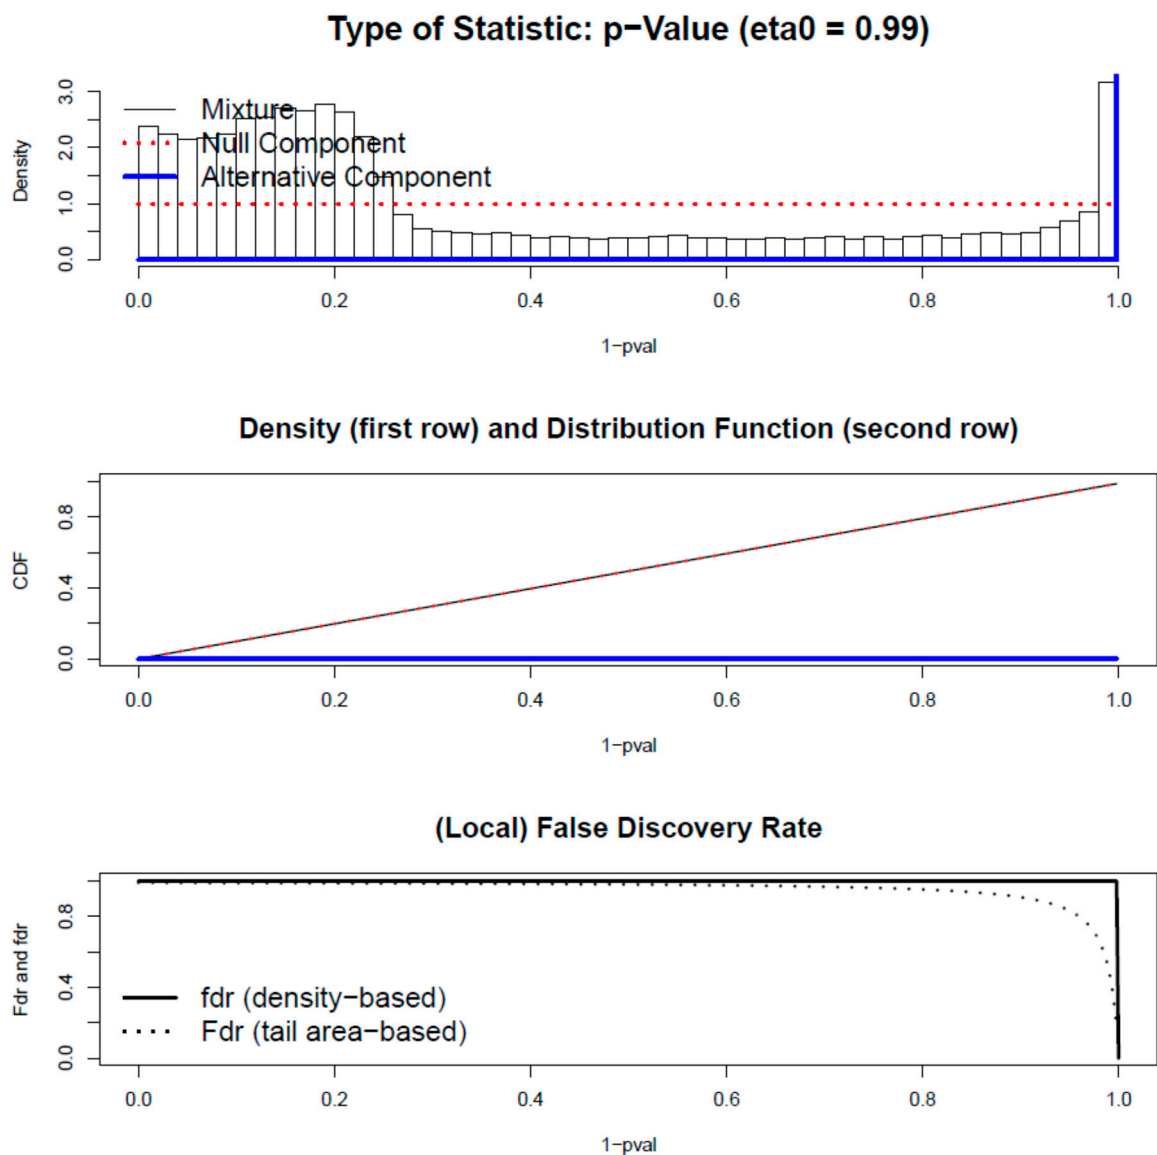

Figure S3. fdrtool's output: mRNA in NSCLC.

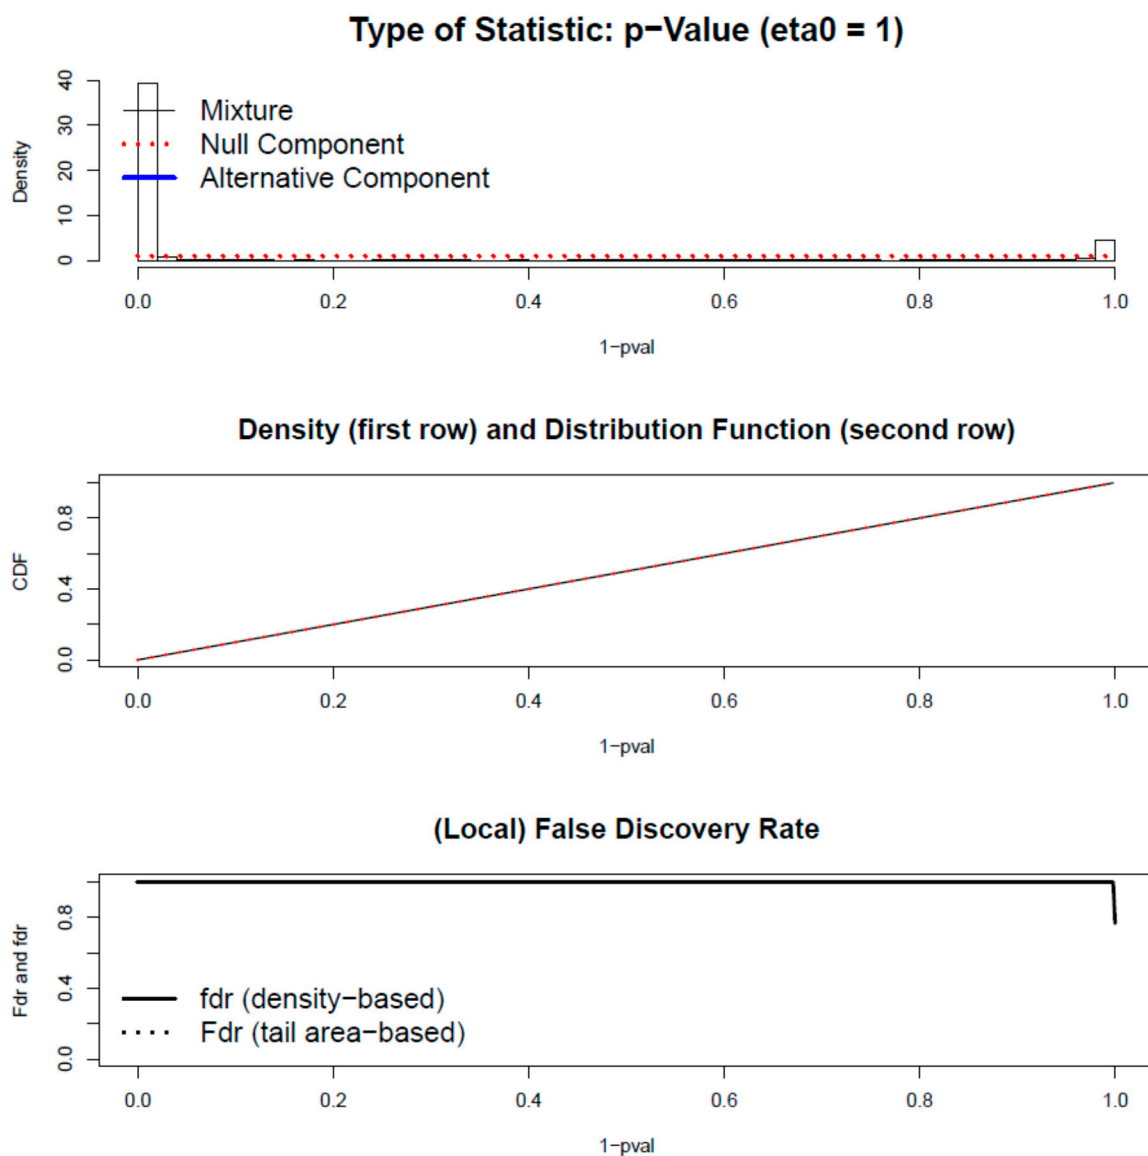

Figure S4. fdrtool's output: miRNA in NSCLC.

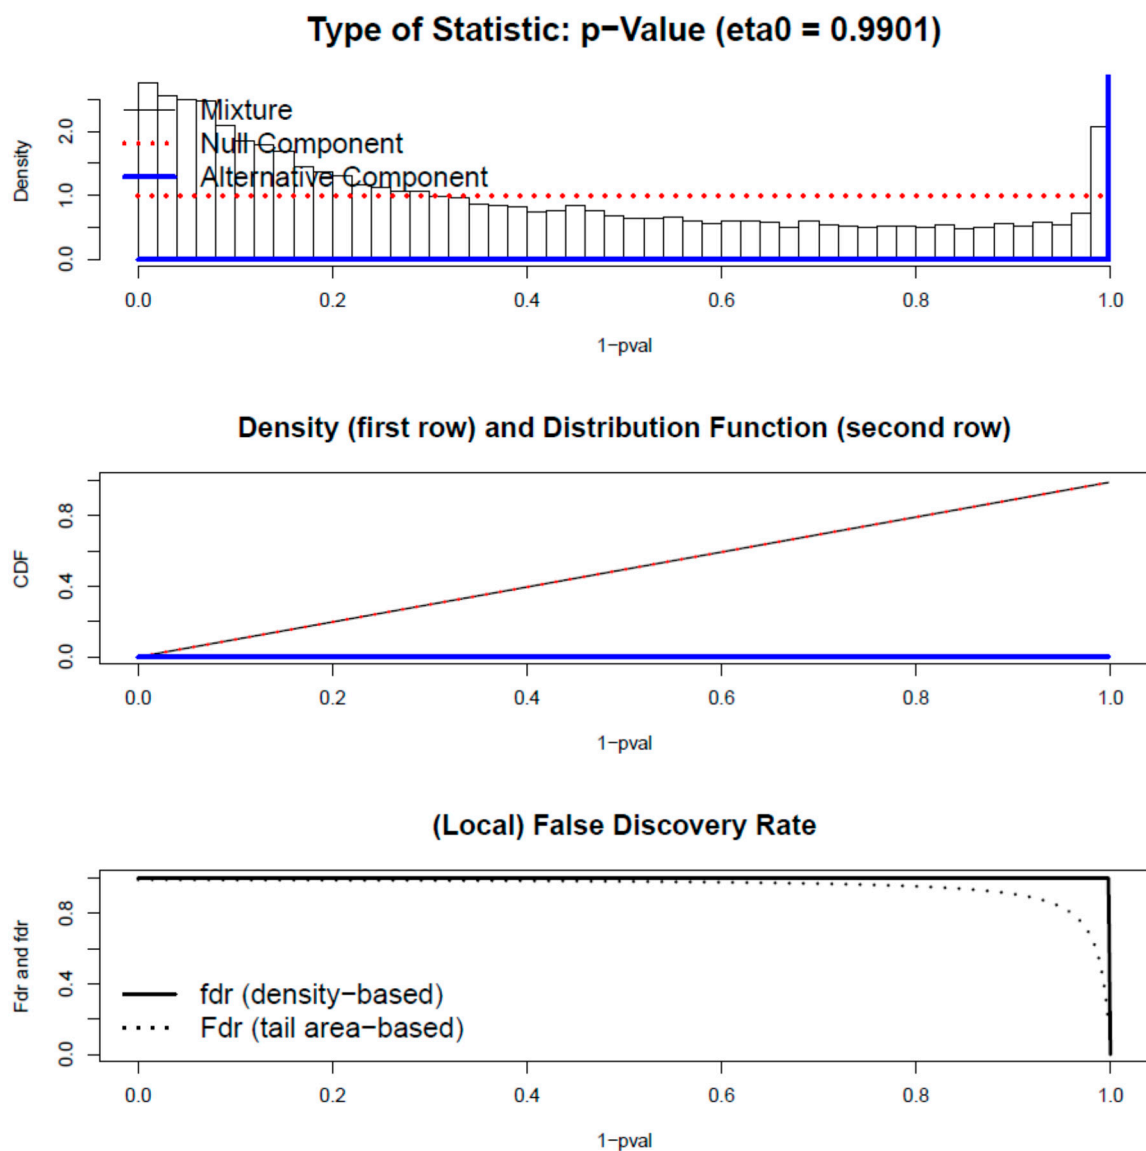

Figure S5. fdrtool's output: mRNA in ESCC.

### Type of Statistic: p-Value ( $\eta_0 = 1$ )

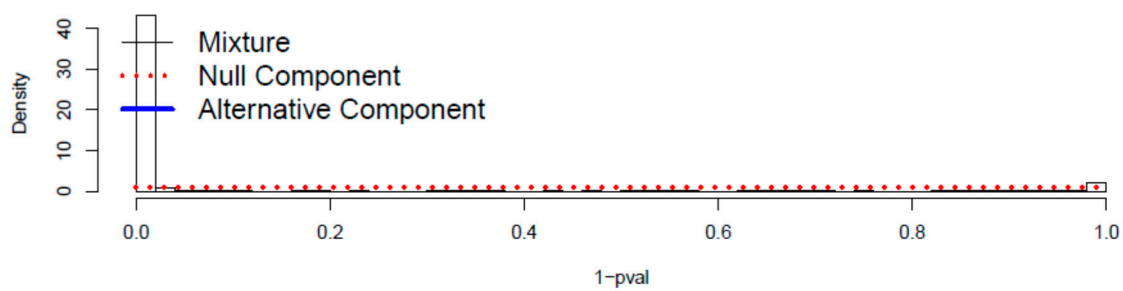

### Density (first row) and Distribution Function (second row)

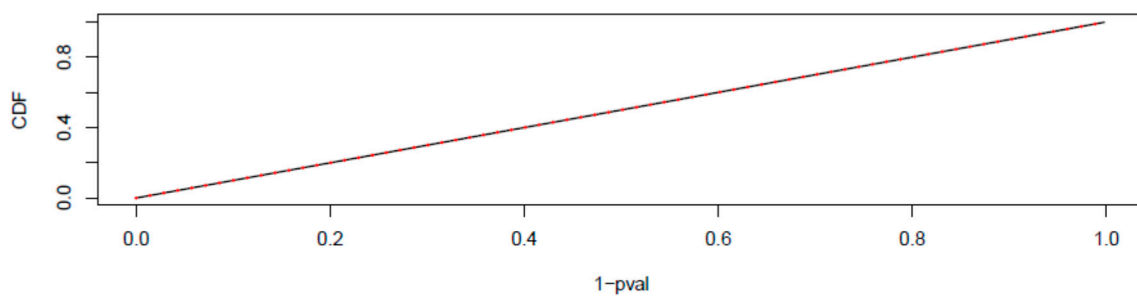

### (Local) False Discovery Rate

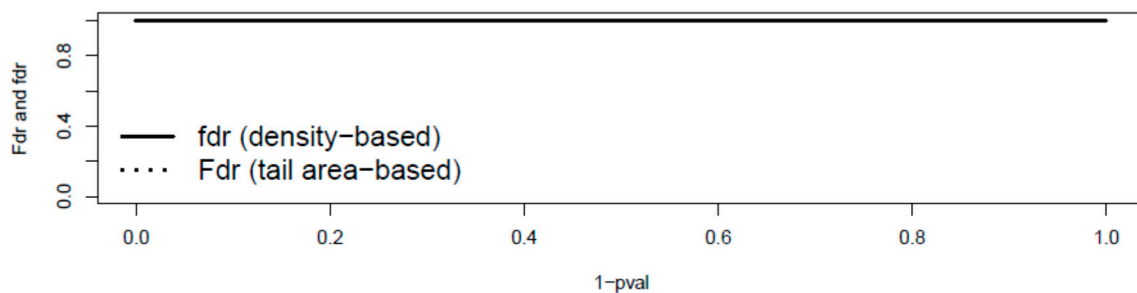

Figure S6. fdrtool's output: miRNA in ESCC.

### Type of Statistic: p-Value (eta0 = 0.9902)

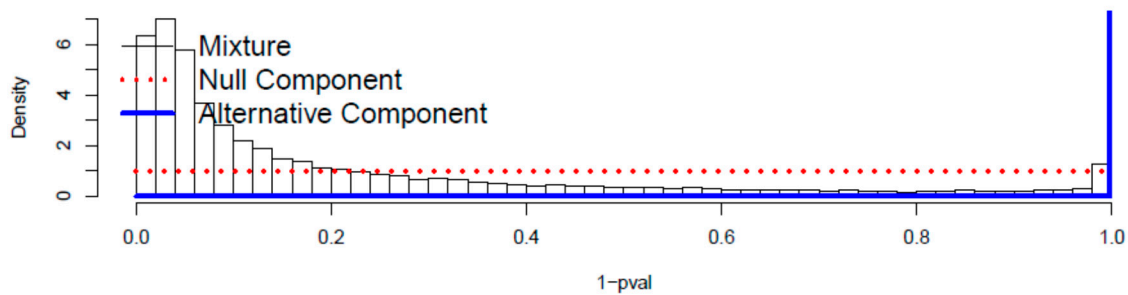

### Density (first row) and Distribution Function (second row)

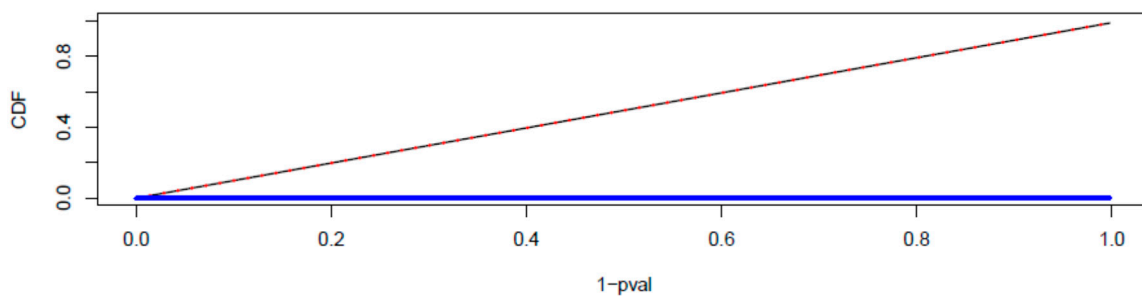

### (Local) False Discovery Rate

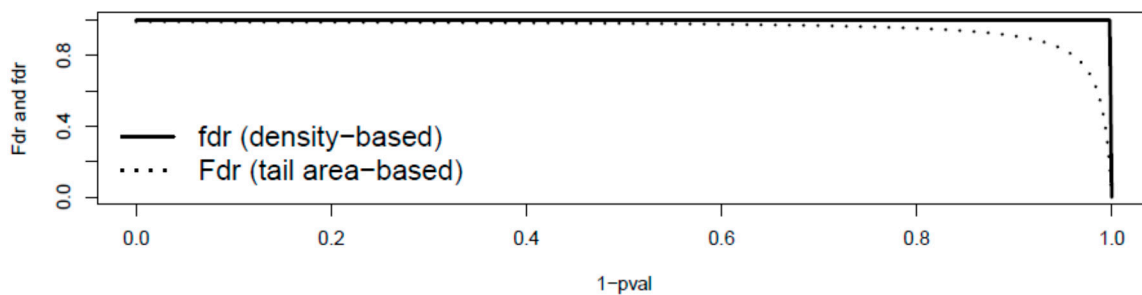

Figure S7. fdrtool's output: mRNA in prostate cancer.

### Type of Statistic: p-Value (eta0 = 0.9438)

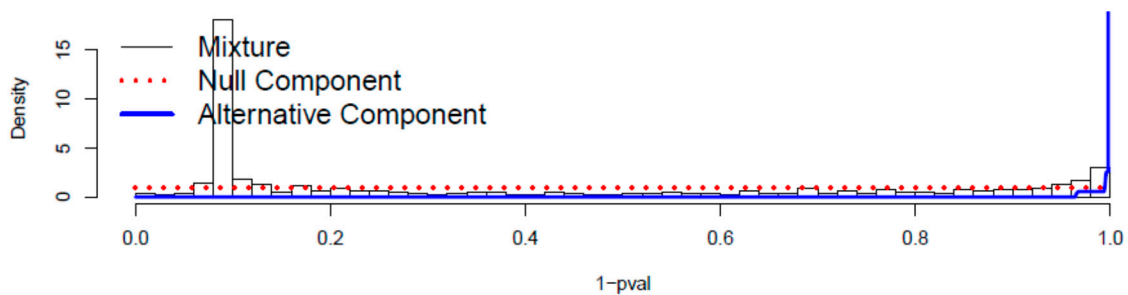

### Density (first row) and Distribution Function (second row)

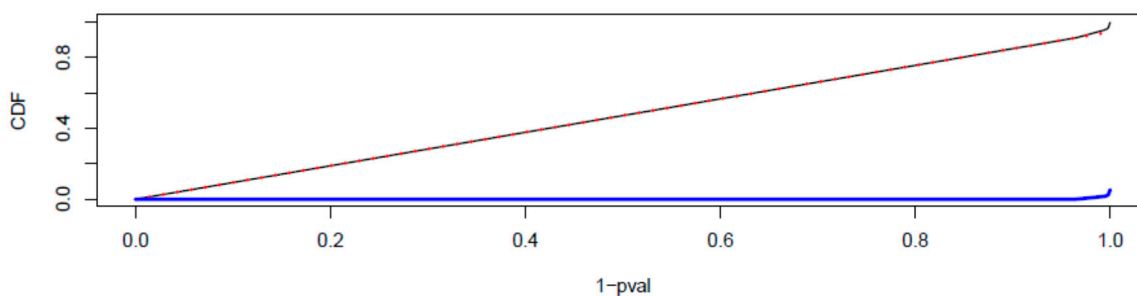

### (Local) False Discovery Rate

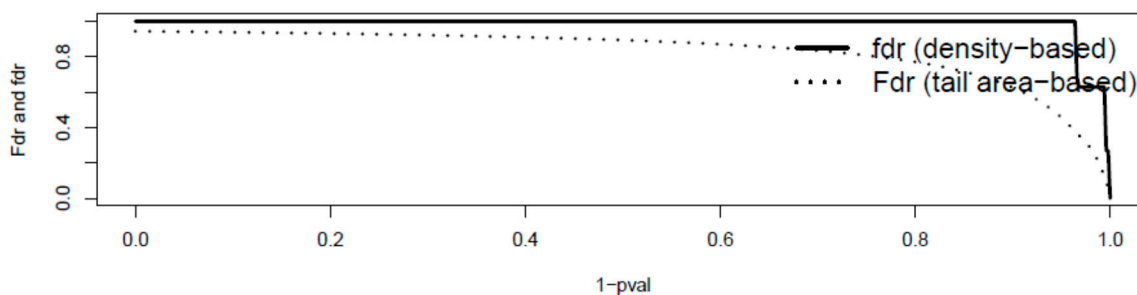

Figure S8. fdrtool's output: miRNA in prostate cancer.



### Type of Statistic: p-Value (eta0 = 0.99)

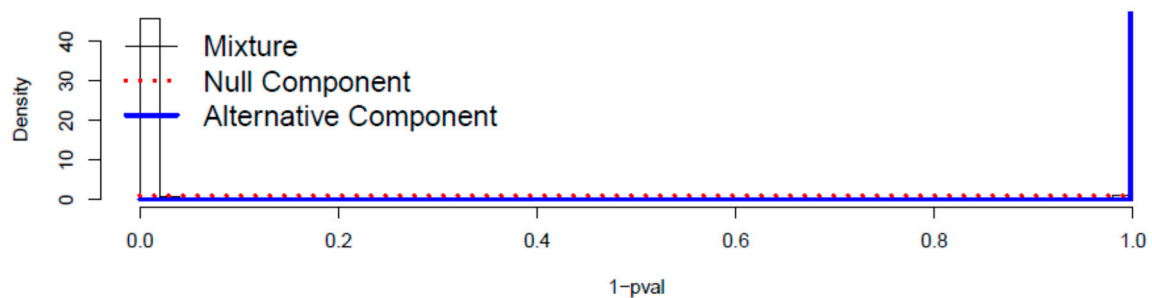

### Density (first row) and Distribution Function (second row)

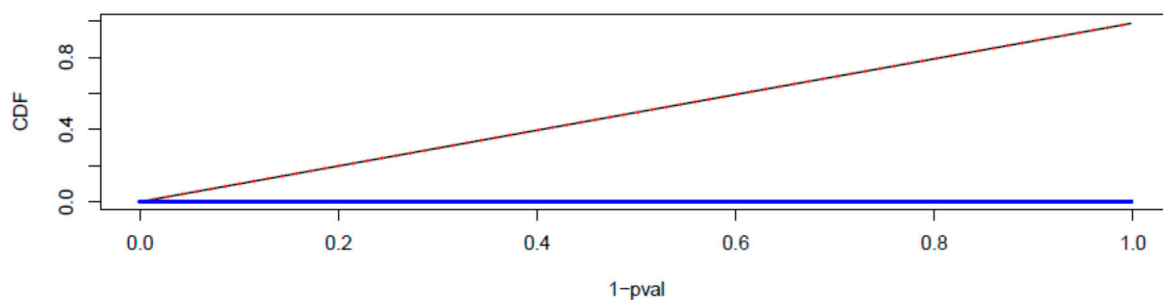

### (Local) False Discovery Rate

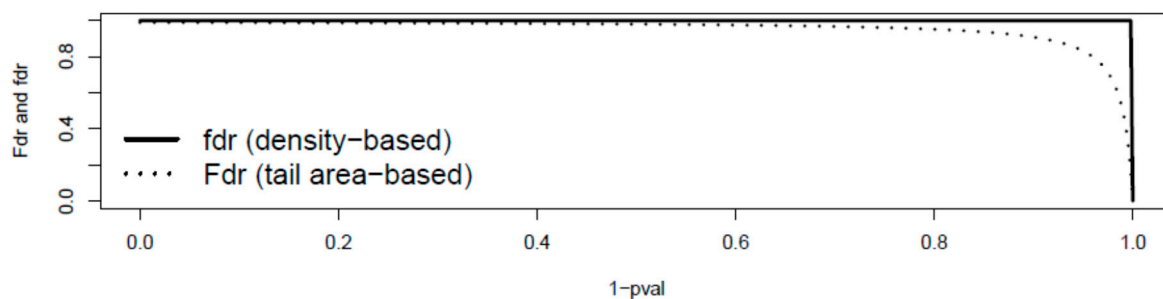

Figure S9. fdrtool's output: mRNA in colon/colorectal cancer.

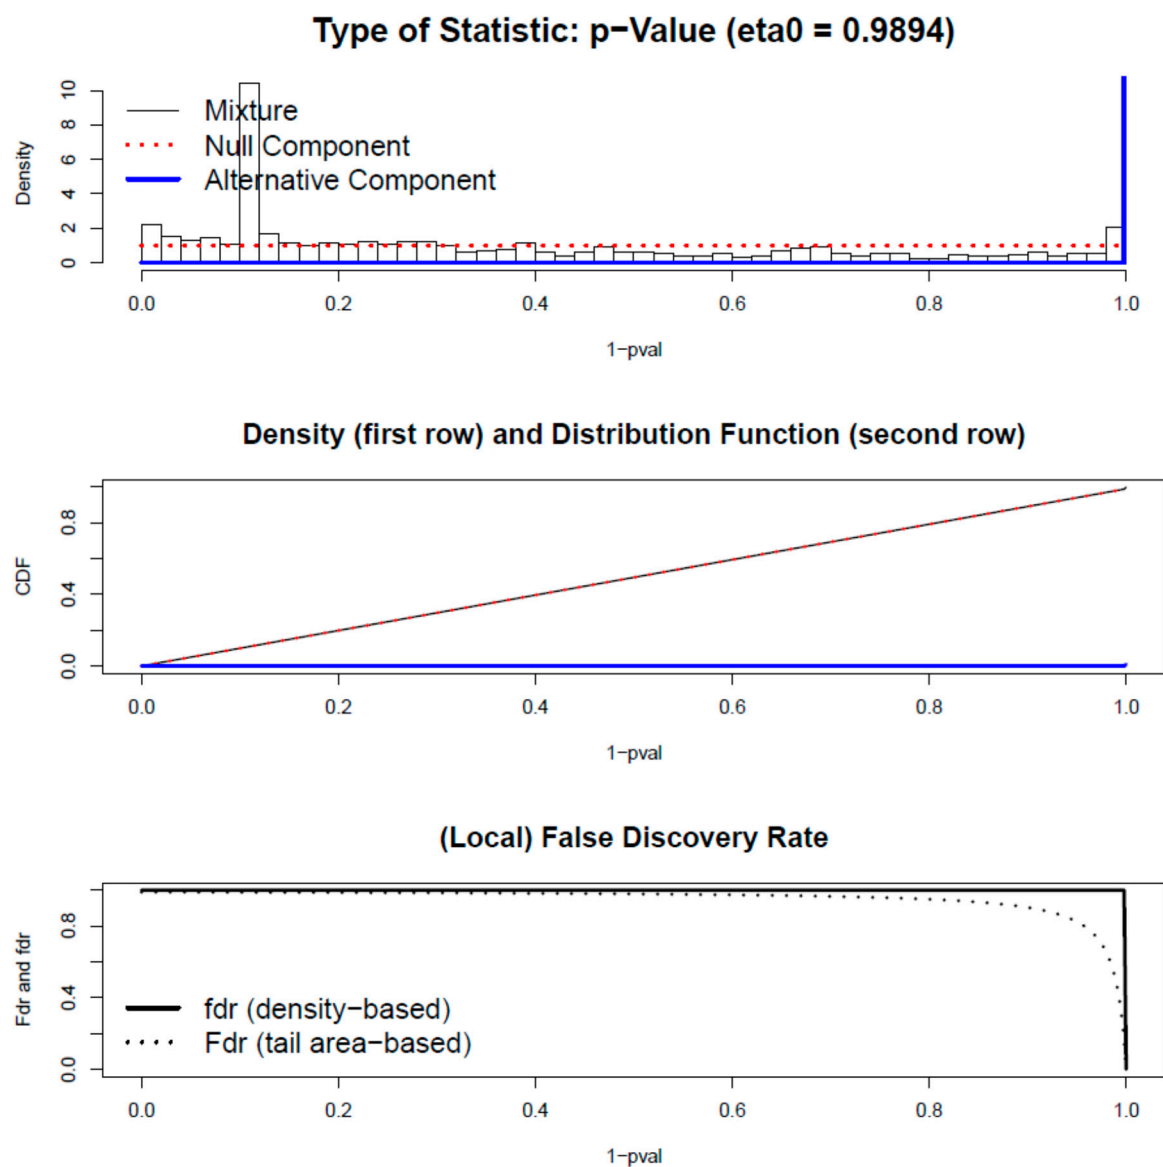

Figure S10. fdrtool's output: miRNA in colon/colorectal cancer.

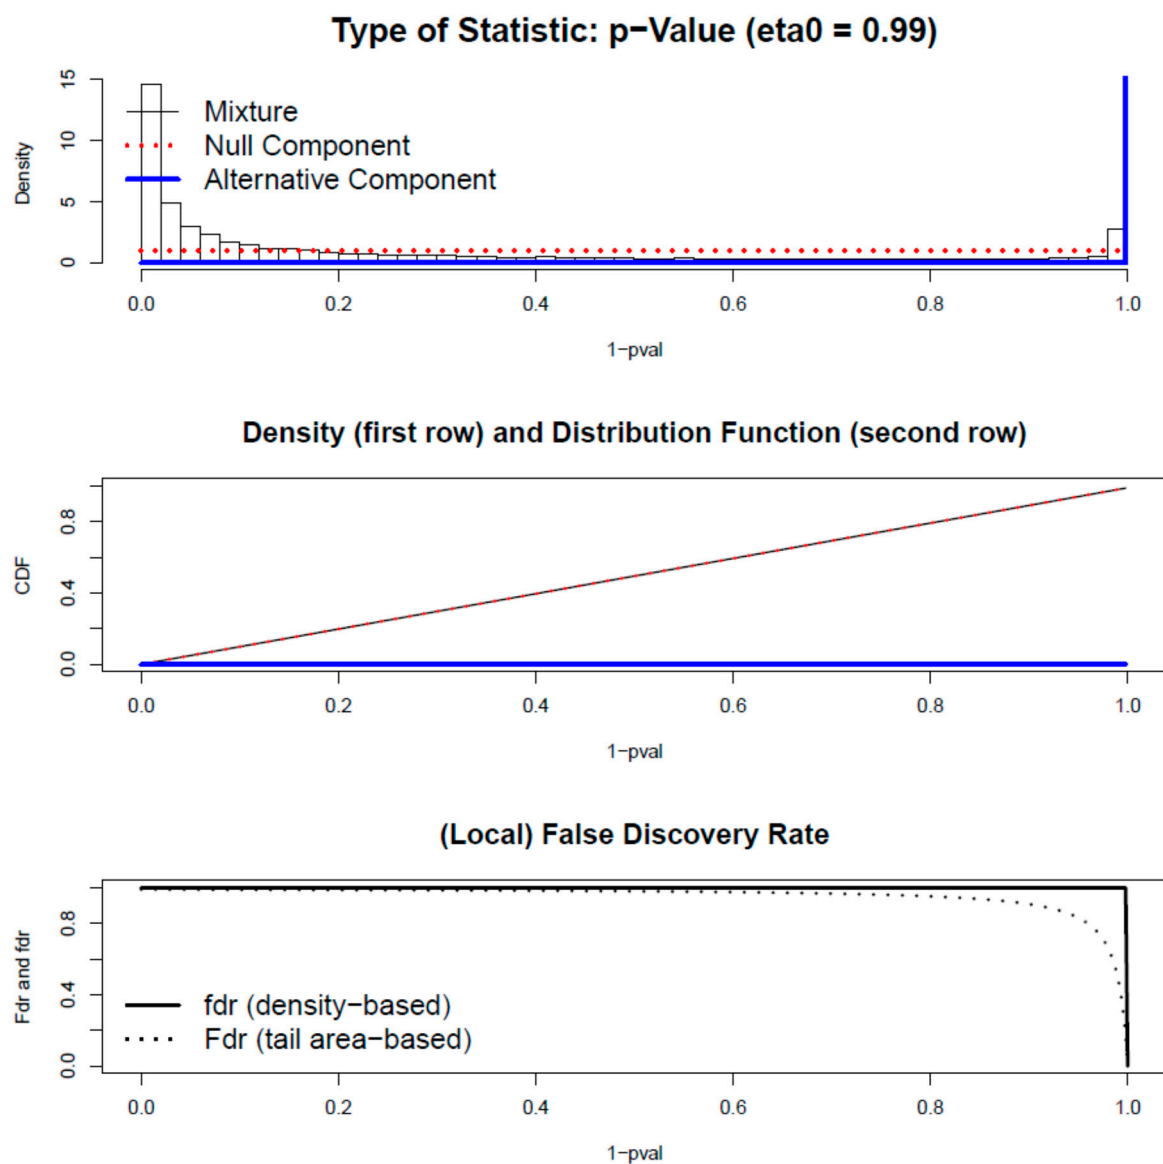

Figure S11. fdrtool's output: mRNA in breast cancer.

### Type of Statistic: p-Value ( $\eta_0 = 1$ )

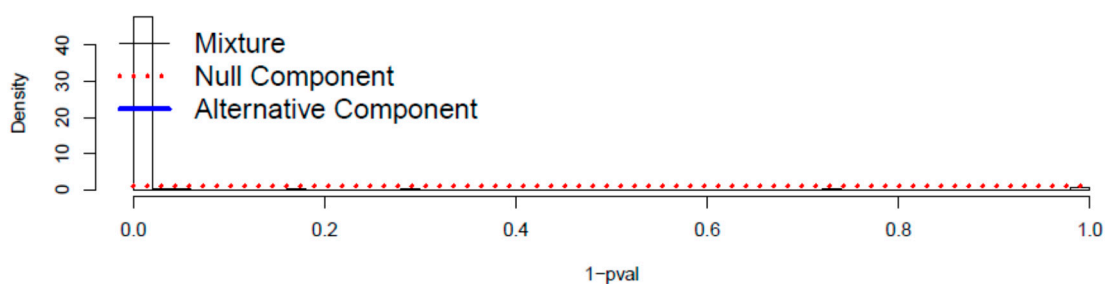

### Density (first row) and Distribution Function (second row)

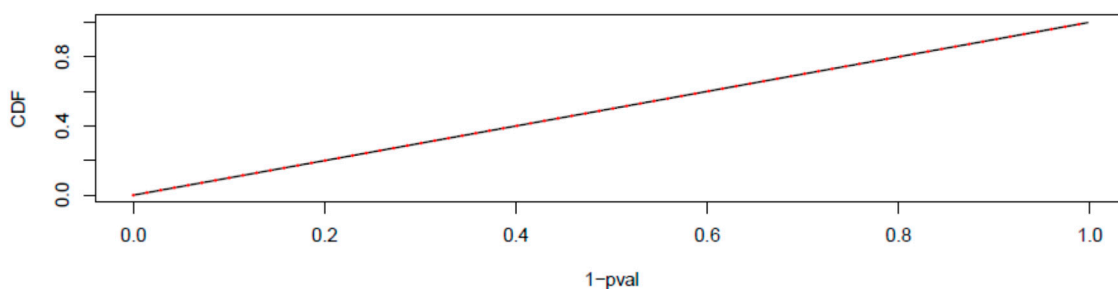

### (Local) False Discovery Rate

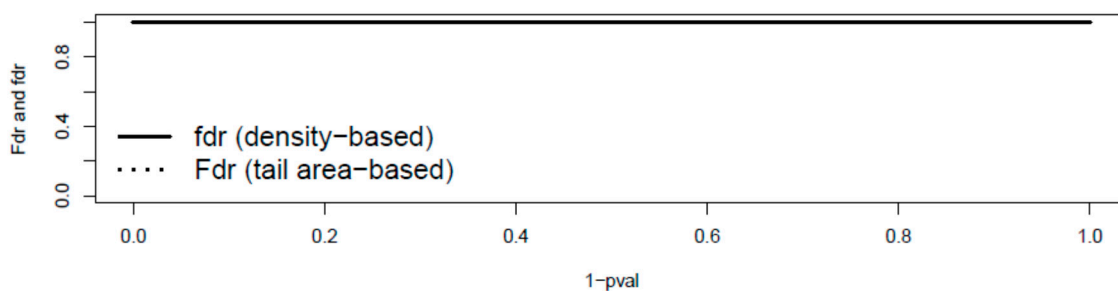

Figure S12. fdrtool's output: miRNA in breast cancer.

**Table S1.** miRNA–mRNA interaction pairs identified in the HCC samples.  $T > N$ : upregulated in tumors,  $T < N$ : upregulated in normal tissues. The starbase column lists the number of cancer cell lines associated with significant reciprocal correlations among the identified pairs. If several miRNAs share the same seed sequence, their numbers are stated separately and connected by a + symbol.

| miRNAs<br>( $T > N$ ) | Gene<br>( $T < N$ ) | Function in HCC                                                                                                                                                     | Starbase |
|-----------------------|---------------------|---------------------------------------------------------------------------------------------------------------------------------------------------------------------|----------|
| miR-93                |                     | activates the c-Met/PI3K/Akt pathway [1]                                                                                                                            |          |
|                       | ESR1                | tumor suppressor [2], promoter methylation [3]                                                                                                                      | 0        |
|                       | CXCL2               | therapeutic target [4], promotes cell proliferation and metastasis [5]                                                                                              | 0        |
| miR-25                |                     | various roles [6], promotes cell growth [7]                                                                                                                         |          |
| miR-92a               |                     | deregulation [8], contributes to tumor growth [9], preserves survival [10]                                                                                          |          |
|                       | CD69                | CD4(+) CD69(+) CD25(-) T cells were identified in HCC tissues [11]                                                                                                  | 6 + 10   |
| miR-15b               |                     | induces endoplasmic reticulum stress and apoptosis [12]                                                                                                             |          |
|                       | CD69                | see miR-25/92a                                                                                                                                                      | 0        |
|                       | GHR                 | related to proliferation [13], targets a long non-coding RNA that increases EGFR expression [14], distinct therapy treatments between positive/negative tumors [13] | 0        |
|                       | GLS2                | tumor suppressor [15], epigenetic silencing [16]                                                                                                                    | 4        |
| miR-148a              |                     | repression of HCC cell malignancy [17]                                                                                                                              | 4        |
|                       | ESR1                | see miR-93                                                                                                                                                          |          |
| miR-125b              |                     | attenuates epithelial-mesenchymal transitions [18]                                                                                                                  |          |
|                       | TAT                 | Loss of one TAT allele [19]                                                                                                                                         | 0        |
| let-7a                |                     | promising tools against systemic HCC [8]                                                                                                                            |          |
|                       | STAB2               | upregulation [20], downregulation suppresses tumor [20]                                                                                                             | 0        |
|                       | GHR                 | see miR-15b                                                                                                                                                         | 0        |

**Table S2.** miRNA–mRNA interaction pairs identified in HCC samples (continued).

| miRNAs<br>( $T < N$ ) | Gene<br>( $T > N$ ) | Function in HCC                                                                                         | Starbase |
|-----------------------|---------------------|---------------------------------------------------------------------------------------------------------|----------|
| miR-20a               |                     | Reduced expression promotes HCC [21]                                                                    |          |
|                       | SLC40A1             | haplotype [22]                                                                                          | 9        |
|                       | HSPA8               | upregulation [23]                                                                                       | 4        |
|                       | GPR88               | –                                                                                                       | 0        |
|                       | PDE3B               | involved in development and metabolism of HCV [24]                                                      | 2        |
| miR-214               |                     | recurrence of HCC [25]                                                                                  |          |
|                       | PEG10               | upregulation [26], associated with poor survival and tumor recurrence [27], promote carcinogenesis [28] | 0        |
| miR-195               |                     | suppresses angiogenesis and metastasis of HCC [29]                                                      |          |
|                       | GPR88               | see miR-20a                                                                                             | 0        |
|                       | GABRE               | upregulation [30]                                                                                       | 0        |
| miR-200b              |                     | suppression of HCC [31]                                                                                 |          |
|                       | CCNA2               | AAV2 integration in CCNA2 [32], associated with low survival sub-class [33]                             | 4        |
| miR-29c               |                     | suppression of HCC [34]                                                                                 |          |
|                       | B3GNT5              | –                                                                                                       | 8        |
| miR-30d               |                     | promotes tumor invasion and metastasis [35]                                                             |          |
|                       | B3GNT5              | see miR-29c                                                                                             | 8        |

**Table S3.** miRNA–mRNA interaction pairs identified in the NSCLC samples. *T > N*: upregulated in tumors, *T < N*: upregulated in normal tissues. For a description of the numbers in the starbase column, see Table S1.

| miRNAs<br>( <i>T &lt; N</i> ) | Gene<br>( <i>T &gt; N</i> ) | Function in NSCLC                                                                     | Starbase |
|-------------------------------|-----------------------------|---------------------------------------------------------------------------------------|----------|
| miR-30a                       |                             | inhibits tumor proliferation [36]                                                     |          |
| miR-30d                       |                             | inhibits tumor proliferation [37]                                                     |          |
|                               | BNC1                        | hypermethylation [38]                                                                 | 0 + 0    |
|                               | PIGX                        | candidate driver genes [39]                                                           | 5 + 4    |
|                               | GCLC                        | drug resistance [40]                                                                  | 3 + 2    |
|                               | THBS2                       | correlated with decreased vascularity [41]                                            | 0 + 0    |
|                               | HMGB3                       | overexpression as biomarker [42]                                                      | 0 + 0    |
|                               | PFN2                        | epigenetic regulation of other genes [43]                                             | 5 + 4    |
|                               | FOXD1                       | association with poor prognosis [44]                                                  | 4 + 7    |
|                               | CYP24A1                     | independent prognostic marker of survival [45]                                        | 5 + 5    |
|                               | PITX1                       | decreased expression [46]                                                             | 7 + 7    |
|                               | BMP7                        | reported biological impact [47]                                                       | 0 + 0    |
|                               | MXRA5                       | frequent mutation [48]                                                                | 0 + 0    |
|                               | SLC7A11                     | contributes to pathogenesis [49]                                                      | 6 + 6    |
|                               | FAP                         | clinical implications [50]                                                            | 8 + 11   |
|                               | BCL11A                      | overexpression predicts survival and relapse [51]                                     | 3 + 5    |
|                               | ADAM12                      | diagnostic marker of proliferation, migration and invasion [52]                       | 0 + 0    |
|                               | ITGA6                       | downregulation in cancer stem cells [53]                                              | 5 + 4    |
|                               | MARK1                       | inhibitor, new target agent [54]                                                      | 0 + 0    |
|                               | NEFL                        | candidate biomarker of recurrence and survival [55]                                   | 5 + 8    |
|                               | GRHL1                       | decreased expression in cell lines [56]                                               | 0 + 0    |
|                               | SLC41A2                     | —                                                                                     | 3 + 6    |
|                               | GDA                         | —                                                                                     | 1 + 4    |
|                               | CDCA7                       | possible subtype-specific expression [57]                                             | 9 + 6    |
|                               | FRMD6                       | —                                                                                     | 6 + 11   |
|                               | CTHRC1                      | associated with tumor aggressiveness and poor prognosis [58]                          | 10 + 8   |
|                               | FBXO32                      | —                                                                                     | 0 + 0    |
|                               | C3orf58                     | —                                                                                     | 4 + 1    |
|                               | PPP1R14C                    | —                                                                                     | 2 + 4    |
|                               | E2F7                        | upregulated in NSCLC treatment [59]                                                   | 10 + 5   |
|                               | SIX1                        | target of tumor suppressor miRNA [60]                                                 | 9 + 5    |
|                               | FAM83F                      | FAM83B, which belongs to the same protein family as FAM83F, is a novel biomarker [61] | 0 + 0    |

**Table S4.** miRNA–mRNA interaction pairs identified in NSCLC samples (continued).

| miRNAs<br>( $T < N$ ) | Gene<br>( $T > N$ ) | Function in NSCLC                                                  | Starbase |
|-----------------------|---------------------|--------------------------------------------------------------------|----------|
| miR-221               |                     | Growth inhibitor [62]                                              |          |
|                       | ATP11B              | —                                                                  | 0        |
|                       | TFAP2A              | —                                                                  | 3        |
|                       | FAT2                | subtype-specific biomarker [63]                                    | 0        |
|                       | IGF2BP2             | —                                                                  | 0        |
| miR-130a              |                     | targets some genes [64]                                            |          |
|                       | SLC2A1              | reported polymorphisms [65]                                        | 2        |
|                       | CALB1               | suggested roles [66]                                               | 0        |
|                       | TP63                | isoform expression [67]                                            | 2        |
|                       | BCL11A              | see miR-30a/30d                                                    | 1        |
|                       | SULF1               | dysregulation [68]                                                 | 0        |
|                       | ADAM12              | see miR-30a/30d                                                    | 3        |
|                       | CEP55               | overexpression and modulation of tumor migration and invasion [69] | 3        |
|                       | GDA                 | see miR-30a/30d                                                    | 6        |
|                       | FRMD6               | see miR-30a/30d                                                    | 4        |
|                       | E2F7                | see miR-30a/30d                                                    | 2        |
| miR-100               |                     | tumor suppressor [70]                                              |          |
|                       | FGFR3               | mutation [71]                                                      | 6        |
|                       | GRHL1               | miR-30a/30d                                                        | 7        |
| miR-223               |                     | potent tumor suppressor [72]                                       |          |
|                       | PFN2                | miR-30a/30d                                                        | 0        |
|                       | ECT2                | overexpression [73]                                                | 3        |
| miR-143               |                     | inhibits NSCLC cell growth and metastasis [74]                     |          |
|                       | COL1A1              | overexpression [75]                                                | 0        |
|                       | COL5A1              | —                                                                  | 0        |
|                       | PLAU                | subtype-specific expression [76]                                   | 0        |
|                       | KLF5                | inhibits apoptosis [77]                                            | 8        |
|                       | SLC7A11             | chemoresistance [78]                                               | 4        |
|                       | ITGA6               | miR-30a/30d                                                        | 2        |
|                       | GOLM1               | overexpression [79]                                                | 5        |
|                       | COL5A2              | overexpression [80]                                                | 0        |
|                       | FAM83F              | see miR-30a/30d                                                    | 0        |

**Table S5.** miRNA–mRNA interaction pairs identified in NSCLC samples (continued).

| miRNAs<br>( <i>T</i> < <i>N</i> ) | Gene<br>( <i>T</i> > <i>N</i> ) | Function in NSCLC                                         | Starbase              |
|-----------------------------------|---------------------------------|-----------------------------------------------------------|-----------------------|
| miR-145                           |                                 | inhibits NSCLE proliferation [81]                         |                       |
|                                   | ABCC1                           | drug resistance [82]                                      | 3                     |
|                                   | HMGB3                           | miR-30a/30d                                               | 6                     |
|                                   | TFRC                            | frequent amplification [83]                               | 7                     |
|                                   | KLF5                            | miR-143                                                   | 4                     |
|                                   | SULF1                           | see miR-130a                                              | 0                     |
| miR-125b                          | PSAT1                           | sustains proliferation [84]                               | 6                     |
|                                   |                                 | downregulation promotes NSCLC invasion and migration [85] |                       |
|                                   | HMGB3                           | miR-30a/30d                                               | 7                     |
|                                   | MMP11                           | correlated with higher-grade NSCLC [86]                   | 0                     |
|                                   | CYP24A1                         | miR-30a/30d                                               | 0                     |
|                                   | RAPGEFL1                        | —                                                         | 0                     |
|                                   | GRHL1                           | miR-30a/30d                                               | 5                     |
|                                   | VANGL2                          | —                                                         | 0                     |
|                                   | FAM83F                          | see miR-30a/30d                                           |                       |
|                                   | miR-195                         |                                                           | tumor suppressor [87] |
| ANLN                              |                                 | plays a critical role in NSCLC [88]                       | 7                     |
| AK4                               |                                 | promotes metastasis [88]                                  | 0                     |
| KCNN4                             |                                 | associated with poor prognosis [89]                       | 1                     |
| CXCL10                            |                                 | blood biomarker [90]                                      | 1                     |
| KIF23                             |                                 | overexpression [91]                                       | 8                     |
| PTHLH                             |                                 | increased in the serum and urine of NSCLE patients [92]   | 3                     |
| HMGA2                             |                                 | overexpression [93]                                       | 8                     |
| LRRC15                            |                                 | —                                                         | 0                     |
| RAPGEFL1                          |                                 | see miR-125b                                              | 0                     |
| FZD10                             |                                 | overexpression [94]                                       | 1                     |
| PLUNC                             |                                 | biomarker [95]                                            | 0                     |
| RGMA                              |                                 | —                                                         | 0                     |
| SLC41A2                           |                                 | see miR-30a/30d                                           | 2                     |
| KCTD1                             |                                 | —                                                         | 5                     |
| FAM110C                           |                                 | —                                                         | 3                     |
| E2F7                              |                                 | see miR-30a/30d                                           | 8                     |
| PRR11                             | cell cycle progression [96]     | 0                                                         |                       |
| ODZ2                              | biomarker [97]                  | 0                                                         |                       |



**Table S6.** miRNA–mRNA interaction pairs identified in NSCLC samples (continued).

| miRNAs<br>( <i>T</i> < <i>N</i> ) | Gene<br>( <i>T</i> > <i>N</i> ) | Function in NSCLC                 | Starbase |
|-----------------------------------|---------------------------------|-----------------------------------|----------|
| miR-26a                           |                                 | drug resistance [98]              |          |
|                                   | COL1A2                          | potential therapeutic target [99] | 0        |
|                                   | PLOD2                           | prognostic variables [100]        | 8        |
|                                   | ADM                             | regulates NSCLC [101]             | 7        |
|                                   | LOXL2                           | downregulation [102]              | 10       |
|                                   | COL5A1                          | see miR-143                       | 8        |
|                                   | COL11A1                         | overexpression [103]              | 0        |
|                                   | TFAP2A                          | see miR-221                       | 5        |
|                                   | COL10A1                         | overexpression [104]              | 0        |
|                                   | WNT5A                           | promotes angiogenesis [105]       | 2        |
|                                   | CILP                            | –                                 | 0        |
|                                   | HMGA2                           | see miR-195                       | 6        |
|                                   | JAG1                            | prognostic biomarkers [106]       | 4        |
|                                   | TP63                            | see miR-130a                      | 0        |
|                                   | SLC7A11                         | see miR-143                       | 6        |
|                                   | BCL11A                          | see miR-30a/30d                   | 2        |
|                                   | SULF1                           | see miR-130a                      | 0        |
|                                   | ADAM12                          | see miR-30a/30d                   | 0        |
|                                   | ITGA6                           | see miR-143                       | 5        |
|                                   | MARK1                           | see miR-30a/30d                   | 3        |
|                                   | HAS3                            | abundant expression [107]         | 0        |
|                                   | VANGL2                          | see miR-125b                      | 1        |
|                                   | E2F7                            | miR-30a/30d                       | 8        |
|                                   | LPAR3                           | –                                 | 4        |
|                                   | GRHL3                           | –                                 | 0        |

**Table S7.** miRNA–mRNA interaction pairs identified in NSCLC samples (continued).

| miRNAs<br>( <i>T</i> < <i>N</i> ) | Gene<br>( <i>T</i> > <i>N</i> ) | Function in NSCLC          | Starbase |
|-----------------------------------|---------------------------------|----------------------------|----------|
| miR-29a                           |                                 | aberrant methylation [108] |          |
|                                   | COL1A1                          | see miR-143                | 4        |
|                                   | COL3A1                          | upregulation [109]         | 4        |
|                                   | SLC16A1                         | –                          | 7        |
|                                   | COL1A2                          | see miR-26a                | 0        |
|                                   | LOXL2                           | see miR-26a                | 6        |
|                                   | COL5A1                          | see miR-26a                | 4        |
|                                   | COL11A1                         | see miR-26a                | 0        |
|                                   | DSG3                            | biomarker [110]            | 0        |
|                                   | PTHLH                           | see miR-195                | 5        |
|                                   | UPK1B                           | a part of classifier [111] | 0        |
|                                   | BCL11A                          | see miR-30a/30d            | 4        |
|                                   | ADAM12                          | see miR-30a/30d            | 6        |
|                                   | COL4A6                          | frequently mutated=[48]    | 0        |
|                                   | ITGA6                           | see miR-30a/30d            | 6        |
|                                   | RAPGEFL1                        | see miR-125b               | 0        |
|                                   | COL5A2                          | see miR-143                | 6        |
|                                   | HAS3                            | see miR-26a                | 3        |
|                                   | KCTD1                           | see miR-195                | 6        |
|                                   | E2F7                            | see miR-30a/30d            | 9        |

**Table S8.** miRNA–mRNA interaction pairs identified in NSCLC samples (continued).

| miRNAs<br>( <i>T</i> > <i>N</i> ) | Gene<br>( <i>T</i> < <i>N</i> ) | Function in NSCLC                             | Starbase |
|-----------------------------------|---------------------------------|-----------------------------------------------|----------|
| miR-106a                          |                                 | promotes growth and metastasis of NSCLC [112] |          |
| miR-17                            |                                 | cancer development [113]                      |          |
|                                   | IGSF10                          | differently expressed [114]                   | 0 + 0    |
|                                   | SLC4A4                          | —                                             | 0 + 0    |
|                                   | LMO3                            | cell growth and metastasis [115]              | 0 + 0    |
|                                   | NR4A2                           | tumor suppressor [116]                        | 5 + 6    |
|                                   | HLF                             | —                                             | 0 + 0    |
|                                   | FOXF1                           | drives NSCLC progression [117]                | 8 + 9    |
|                                   | SMAD6                           | contributes to patient survival [118]         | 4 + 8    |
|                                   | CD69                            | detected expression [119]                     | 6 + 9    |
|                                   | DLC1                            | tumor suppressor [120]                        | 9 + 9    |
|                                   | TMEM100                         | downregulation [114]                          | 9 + 8    |
|                                   | TBX3                            | overexpression [121]                          | 5 + 6    |
|                                   | COL4A3                          | correlated with poor prognosis [122]          | 0 + 0    |
|                                   | NTN4                            | —                                             | 6 + 10   |
|                                   | SCD5                            | abundance [123]                               | 4 + 5    |
|                                   | TMTC1                           | —                                             | 6 + 9    |
|                                   | PTPN21                          | mutations [124]                               | 9 + 8    |
|                                   | NEDD4L                          | prognostic marker [125]                       | 3 + 4    |
|                                   | ANKRD29                         | —                                             | 9 + 11   |
|                                   | GLDN                            | —                                             | 0 + 0    |
|                                   | ATP11A                          | —                                             | 6 + 3    |
|                                   | GPR133                          | mutation [126]                                | 7 + 10   |
|                                   | NCKAP5                          | downregulation [114]                          | 4 + 6    |

**Table S9.** miRNA–mRNA interaction pairs identified in NSCLC samples (continued).

| miRNAs<br>( <i>T</i> > <i>N</i> ) | Gene<br>( <i>T</i> < <i>N</i> ) | Function in NSCLC                                                           | Starbase |
|-----------------------------------|---------------------------------|-----------------------------------------------------------------------------|----------|
| miR-141                           |                                 | biomarker [127]                                                             |          |
| miR-200a                          |                                 | targets multiple NSCLC prognostic markers [128]                             |          |
|                                   | PLCB4                           | downregulation [129]                                                        | 0 + 0    |
|                                   | LMO3                            | see miR-106a/17                                                             | 5 + 5    |
|                                   | HLF                             | see miR-106a/17                                                             | 0 + 0    |
|                                   | GPM6B                           | —                                                                           | 0 + 0    |
|                                   | PDZD2                           | —                                                                           | 0 + 0    |
|                                   | PTCH1                           | suppressed by miR-212 [130]                                                 | 4 + 0    |
|                                   | GATA6                           | tumor inhibitor [131]                                                       | 6 + 5    |
|                                   | FOXA2                           | downregulated [132]                                                         | 0 + 0    |
|                                   | DLC1                            | see miR-106a/17                                                             | 11 + 9   |
|                                   | ATP8A1                          | downregulated [133]                                                         | 5 + 5    |
|                                   | CLIC5                           | downregulated [134]                                                         | 0 + 0    |
|                                   | SLC1A1                          | polymorphisms [65]                                                          | 4 + 3    |
|                                   | PCDH9                           | possible association with NSCLC development, metastasis and prognosis [135] | 11 + 8   |
|                                   | SOX17                           | promoter of methylation in plasma-circulating tumors DNA [136]              | 0 + 0    |
|                                   | SCD5                            | see miR-106a/17                                                             | 5 + 4    |
|                                   | SEMA6A                          | downregulation [137]                                                        | 0 + 0    |
|                                   | HSPC159                         | —                                                                           | 0 + 0    |
|                                   | TMTC1                           | see miR-106a/17                                                             | 0 + 0    |
|                                   | SYNPO2                          | upregulated under HDACi treatment [138]                                     | 0 + 0    |
|                                   | SCN7A                           | associated with good survival [139]                                         | 0 + 0    |
|                                   | ADRB1                           | ADRB1-specific or non-selective drug improves survival [140]                | 4 + 2    |
|                                   | NCKAP5                          | see miR-106a/17                                                             | 3 + 2    |
|                                   | PAQR5                           | —                                                                           | 2 + 3    |

**Table S10.** miRNA–mRNA interaction pairs identified in NSCLC samples (continued).

| miRNAs<br>( $T > N$ ) | Gene<br>( $T < N$ ) | Function in NSCLC                                                     | Starbase |
|-----------------------|---------------------|-----------------------------------------------------------------------|----------|
| miR-200b              |                     | targets multiple NSCLC prognostic markers [128]                       |          |
| miR-200c              |                     | inhibits invasion and metastasis [141]                                |          |
|                       | DUSP1               | promotes angiogenesis, invasion and metastasis [142]                  | 7 + 10   |
|                       | FHL1                | downregulation [143]                                                  | 10 + 9   |
|                       | SLC4A4              | see miR-106a/17                                                       | 0 + 0    |
|                       | REEP1               | upregulated under both 5-dAzaC treatment and BRG1 re-expression [144] | 4 + 5    |
|                       | HLF                 | see miR-106a/17                                                       | 0 + 0    |
|                       | DACH1               | tumor suppressor [145]                                                | 0 + 1    |
|                       | FOXF1               | see miR-106a/17                                                       | 9 + 8    |
|                       | GPM6A               | differential expression [146]                                         | 7 + 8    |
|                       | CHRD1               | aberrant gene expression [147]                                        | 0 + 0    |
|                       | PTCH1               | see miR-141/200a                                                      | 2 + 3    |
|                       | DLC1                | see miR-106a/17                                                       | 8 + 9    |
|                       | KLF4                | metastasis regulation [148]                                           | 4 + 2    |
|                       | COL4A3              | see miR-106a/17                                                       | 6 + 6    |
|                       | PTPN21              | see miR-106a/17                                                       | 7 + 8    |
|                       | SEMA6D              | —                                                                     | 5 + 3    |
|                       | NEDD4L              | see miR-106a/17                                                       | 1 + 1    |
|                       | AFF3                | —                                                                     | 0 + 0    |
|                       | GCOM1               | downregulation [149]                                                  | 3 + 5    |
|                       | MAMDC2              | aberrant methylation [150]                                            | 7 + 10   |
|                       | PAQR5               | see miR-141/200a                                                      | 0 + 0    |

**Table S11.** miRNA–mRNA interaction pairs identified in NSCLC samples (continued).

| miRNAs<br>( $T > N$ ) | Gene<br>( $T < N$ ) | Function in NSCLC                                   | Starbase |
|-----------------------|---------------------|-----------------------------------------------------|----------|
| miR-205               |                     | drives malignant phenotype [151]                    |          |
|                       | LPCAT1              | upregulation [152]                                  | 4        |
|                       | SLC4A4              | see miR-106a/17                                     | 0        |
|                       | FOXF1               | see miR-106a/17                                     | 7        |
|                       | TBX3                | see miR-106a/17                                     | 0        |
|                       | SCD5                | see miR-106a/17                                     | 0        |
|                       | AFF3                | see miR-200b/200c                                   | 0        |
|                       | GCOM1               | see miR-200b/200c                                   | 0        |
|                       | LRRK2               | —                                                   | 0        |
| miR-21                |                     | restrains cell proliferation and migration [153]    |          |
|                       | THBD                | can be used as a part of survival prediction [154]  | 0        |
|                       | PDZD2               | see miR-141/200a                                    | 8        |
|                       | CD69                | see miR-106a/17                                     | 0        |
|                       | PTCH1               | see miR-141/200a                                    | 0        |
|                       | OLR1                | can be used as a part of prognosis prediction [155] | 2        |
|                       | LIFR                | —                                                   | 11       |
|                       | ARHGEF26            | —                                                   | 0        |
|                       | SOX7                | downregulation [156]                                | 7        |
|                       | KCNT2               | —                                                   | 0        |

**Table S12.** miRNA–mRNA interaction pairs identified in NSCLC samples (continued).

| miRNAs<br>( <i>T</i> > <i>N</i> ) | Gene<br>( <i>T</i> < <i>N</i> ) | Function in NSCLC                                        | Starbase |
|-----------------------------------|---------------------------------|----------------------------------------------------------|----------|
| miR-19b                           |                                 | circulating biomarker [157]                              |          |
|                                   | TGM2                            | cisplatin resistance marker [158]                        | 9        |
|                                   | EDNRB                           | Aberrant promoter methylation [159]                      | 8        |
|                                   | REEP1                           | see miR-200b/200c                                        | 3        |
|                                   | HLF                             | see miR-106a/17                                          | 0        |
|                                   | DLC1                            | see miR-106a/17                                          | 8        |
|                                   | LIMCH1                          | inclusion in tumorigenesis [160]                         | 9        |
|                                   | PARM1                           | —                                                        | 8        |
|                                   | CAB39L                          | —                                                        | 0        |
|                                   | FRAS1                           | knockdown reduces A549 cell migration and invasion [161] | 3        |
|                                   | HSPC159                         | see miR-141/200a                                         | 0        |
|                                   | PTPN21                          | see miR-106a/17                                          | 9        |
|                                   | VSIG10                          | —                                                        | 2        |
|                                   | SEMA6D                          | see miR-200b/200c                                        | 4        |
|                                   | ARHGEF26                        | see miR-21                                               | 0        |
|                                   | SYNPO2                          | see miR-141/200a                                         | 0        |
|                                   | ADRB1                           | see miR-141/200a                                         | 9        |
|                                   | LRRK2                           | see miR-205                                              | 0        |
|                                   | ATP11A                          | see miR-106a/17                                          | 2        |
|                                   | SCN4B                           | —                                                        | 0        |
|                                   | NCKAP5                          | see miR-106a/17                                          | 6        |
|                                   | KCNT2                           | see miR-21                                               | 0        |

**Table S13.** miRNA–mRNA interaction pairs identified in ESCC samples. *T* > *N*: upregulated in tumors, *T* < *N*: upregulated in normal tissues. For a description of the numbers in the starbase column, see Table S1.

| miRNAs<br>( <i>T</i> < <i>N</i> ) | Gene<br>( <i>T</i> > <i>N</i> ) | Function in ESCC                                                                        | Starbase |
|-----------------------------------|---------------------------------|-----------------------------------------------------------------------------------------|----------|
| miR-203                           |                                 | G1 arrest [162], downregulation [163]                                                   |          |
|                                   | BIRC5                           | overexpression [164]                                                                    | 1        |
|                                   | TP63                            | tumor suppressor [165]                                                                  | 0        |
| ( <i>T</i> > <i>N</i> )           | ( <i>T</i> < <i>N</i> )         |                                                                                         |          |
| miR-223                           |                                 | clinically significant [166]; overexpression regulates the ubiquitin ligase FBXW7 [167] |          |
|                                   | HLF                             | lineage - specifically essential for tumor growth [168]                                 | 0        |
|                                   | SORBS1                          | significantly shortened tandem 3' UTRs [169]                                            | 6        |

**Table S14.** miRNA–mRNA interaction pairs identified in prostate cancer samples.  $T > N$ : upregulated in tumors,  $T < N$ : upregulated in normal tissues. For a description of the numbers in the starbase column, see Table S1.

| miRNAs<br>( $T > N$ ) | Gene<br>( $T < N$ ) | Function in Prostate Cancer                           | Starbase |
|-----------------------|---------------------|-------------------------------------------------------|----------|
| miR-136               |                     | biomarker [170]                                       |          |
|                       | EIF4B               | related to anticancer activity [171]                  | 6        |
| miR-145               | HOXC10              | aberrant expression [172]                             | 0        |
|                       |                     | suppress the androgen receptor [173]                  |          |
|                       | TFRC                | biomarker [174]                                       | 7        |
|                       | EIF4B               | see miR-136                                           | 0        |
|                       | KIAA0355            | —                                                     | 0        |
|                       | USP31               | —                                                     | 2        |
|                       | ZDHHC8              | —                                                     | 0        |
| miR-22                |                     | overexpression in DU145 [175]                         |          |
|                       | KIAA0355            | see miR-145                                           | 7        |
|                       | PTEN                | genomic rearrangement [176]                           | 2        |
| miR-494               | ZNF827              | —                                                     | 0        |
|                       |                     | suppress proliferation, invasion, and migration [177] |          |
|                       | C14orf43            | —                                                     | 2        |
|                       | YEATS2              | —                                                     | 1        |
|                       | PTEN                | see miR-22                                            | 1        |
|                       | USP31               | see miR-145                                           | 1        |
|                       | USP27X              | —                                                     | 0        |

**Table S15.** miRNA–mRNA interaction pairs identified in prostate cancer samples (continued).

| miRNAs<br>( $T < N$ ) | Gene<br>( $T > N$ ) | Function in Prostate Cancer               | Starbase |
|-----------------------|---------------------|-------------------------------------------|----------|
| let-7a/7f             |                     | inclusion in tumorigenesis [178]          |          |
|                       | NXT2                | —                                         | 0+1      |
|                       | ANKRD12             | —                                         | 1+2      |
|                       | FOXP1               | tumor suppressor [179]                    | 3+1      |
|                       | RTCD1               | —                                         | 7+5      |
|                       | PLEKHG6             | —                                         | 0+0      |
| miR-200a              | FOXP1               | tumor suppressor [180]<br>see let-7a/7f   | 6        |
| miR-200b              |                     | tumor suppressor [180]                    |          |
|                       | FOXP1               | see let-7a/7f                             | 0        |
|                       | CADM1               | inactivated by methylation promoter [181] | 2        |
| miR-20b               | PFN2                | —                                         | 0        |
|                       |                     | reported importance [182]                 |          |
|                       | ANKRD12             | see let-7a/7f                             | 3        |
|                       | RGNEF               | —                                         | 3        |
|                       | PFN2                | see miR-200b                              | 1        |

**Table S16.** miRNA–mRNA interaction pairs identified in colorectal/colon cancer samples.  $T > N$ : upregulated in tumors,  $T < N$ : upregulated in normal tissues. For a description of the numbers in the starbase column, see Table S1.

| miRNAs<br>( $T < N$ )   | Gene<br>( $T > N$ )  | Function in Colorectal/Colon Cancer                                                                  | Starbase |
|-------------------------|----------------------|------------------------------------------------------------------------------------------------------|----------|
| miR-182                 | FN1                  | deregulation promotes proliferation [183]<br>upregulation [184]                                      | 0        |
| miR-183                 | EEF2                 | overexpression [185]<br>knockdown inhibits growth [186]                                              | 4        |
| miR-96                  | FN1                  | overexpression [187]<br>see miR-182                                                                  | 9        |
| ( $T > N$ )<br>miR-133a | ( $T < N$ )<br>PTPRO | tumor suppressor [188]<br>sensitization [189]                                                        | 0        |
| miR-137                 | SLC25A5              | tumor suppressor [190]<br>—                                                                          | 3        |
| miR-149                 | IGJ                  | tumor suppressor [191]<br>downregulation [192]                                                       | 0        |
| miR-30a                 | MYH11                | targets the insulin receptor [193]<br>down-regulated expression correlates with poor prognosis [194] | 0        |
|                         | CEACAM1              | regulates metastasis [195]                                                                           | 0        |

**Table S17.** miRNA–mRNA interaction pairs identified in breast cancer samples.  $T > N$ : upregulated in tumors,  $T < N$ : upregulated in normal tissues. For a description of the numbers in the starbase column, see Table S1.

| miRNAs<br>( $T > N$ ) | Gene<br>( $T < N$ ) | Function in Breast Cancer                       | Starbase |
|-----------------------|---------------------|-------------------------------------------------|----------|
| let-7i                |                     | regulates self-renewal and tumorigenicity [196] |          |
|                       | AMT                 | subtype-specific downregulation [197]           | 4        |
|                       | GHR                 | up-expression [198]                             | 0        |
|                       | HOXA9               | modulates tumor phenotype [199]                 | 0        |
| miR-148a              |                     | inhibits migration of breast cancer cells [200] |          |
|                       | CNN1                | possible therapeutic target [201]               | 0        |
|                       | FOSB                | overexpression [202]                            | 0        |
|                       | TNXB                | adhesion modulation [203]                       | 0        |
| miR-19b               |                     | regulates tissue factor expression [204]        |          |
|                       | NCALD               | frequent amplification [205]                    | 0        |
|                       | HOXA9               | see let-7i                                      | 1        |
|                       | IRX4                | —                                               | 0        |
|                       | CXCL12              | promotes metastasis [206]                       | 0        |
|                       | MATN2               | downregulation [207]                            | 9        |
| miR-21                |                     | overexpression [208]                            |          |
|                       | MSX1                | —                                               | 6        |
|                       | MATN2               | see miR-19b                                     | 9        |
| miR-23a               |                     | overexpression [209]                            |          |
|                       | SFRP1               | associated with neoadjuvant chemotherapy [210]  | 0        |
|                       | FOSB                | see miR-148a                                    | 0        |
|                       | CXCL12              | see miR-19b                                     | 5        |
| miR-24                |                     | enhances tumor invasion and metastasis [211]    |          |
|                       | NCALD               | see miR-19b                                     | 0        |

**Table S18.** miRNA–mRNA interaction pairs identified in breast cancer samples (continued).

| miRNAs<br>(T < N) | Gene<br>(T > N) | Function in Breast Cancer                              | Starbase               |
|-------------------|-----------------|--------------------------------------------------------|------------------------|
| let-7b            |                 | regulates self-renewal and tumorigenicity [196]        |                        |
|                   | ICOS            | associated with poor prognosis [212]                   | 0                      |
|                   | SYT1            | possible biomarker [213]                               | 0                      |
|                   | ERO1L           | associated with overall good survival [214]            | 4                      |
|                   | CTSC            | metastasis [215]                                       | 3                      |
|                   | S100A8          | aggression [216]                                       | 0                      |
| miR-125b          | RDH10           | —                                                      | 4                      |
|                   |                 | targets ARID3B [217]                                   |                        |
|                   | DUSP6           | silencing inhibits proliferation [218]                 | 5                      |
|                   | CCR2            | coordinates survival and motility [219]                | 0                      |
|                   | BIN2            | also known as breast cancer-associated protein 1 [220] | 0                      |
|                   | WARS            | good prognostic marker [221]                           | 5                      |
|                   | PDE7A           | —                                                      | 4                      |
|                   | GALNT7          | —                                                      | 5                      |
|                   | GLS             | promotes proliferation [222]                           | 0                      |
|                   | miR-143         |                                                        | tumor suppressor [223] |
| WHSC1             |                 | positive regulator of ER $\alpha$ signaling [224]      | 0                      |
| miR-145           | ITGA6           | overexpression [225]                                   | 2                      |
|                   |                 | tumor suppressor [223]                                 |                        |
|                   | DUSP6           | see miR-125b                                           | 1                      |
| miR-22            | RPS6KB1         | alteration [226]                                       | 3                      |
|                   | ITPR2           | fused with ETV6 [227]                                  | 0                      |
|                   |                 | biomarker [228]                                        |                        |
|                   | FOSL1           | overexpression inhibition decreases cell growth [229]  | 2                      |

## References

- Ohta, K.; Hoshino, H.; Wang, J.; Ono, S.; Iida, Y.; Hata, K.; Huang, S.K.; Colquhoun, S.; Hoon, D.S. MicroRNA-93 activates c-Met/PI3K/Akt pathway activity in hepatocellular carcinoma by directly inhibiting PTEN and CDKN1A. *Oncotarget* **2015**, *6*, 3211–3224.
- Hishida, M.; Nomoto, S.; Inokawa, Y.; Hayashi, M.; Kanda, M.; Okamura, Y.; Nishikawa, Y.; Tanaka, C.; Kobayashi, D.; Yamada, S.; *et al.* Estrogen receptor 1 gene as a tumor suppressor gene in hepatocellular carcinoma detected by triple-combination array analysis. *Int. J. Oncol.* **2013**, *43*, 88–94.
- Dou, C.Y.; Fan, Y.C.; Cao, C.J.; Yang, Y.; Wang, K. Sera DNA Methylation of CDH1, DNMT3b and ESR1 Promoters as Biomarker for the Early Diagnosis of Hepatitis B Virus-Related Hepatocellular Carcinoma. *Dig. Dis. Sci.* **2015**, doi:10.1007/s10620-015-3975-3.
- Wilson, C.L.; Jurk, D.; Fullard, N.; Banks, P.; Page, A.; Luli, S.; Elsharkawy, A.M.; Gieling, R.G.; Chakraborty, J.B.; Fox, C.; *et al.* NF $\kappa$ B1 is a suppressor of neutrophil-driven hepatocellular carcinoma. *Nat. Commun.* **2015**, *6*, 6818.
- Song, X.; Wang, Z.; Jin, Y.; Wang, Y.; Duan, W. Loss of miR-532-5p in vitro promotes cell proliferation and metastasis by influencing CXCL2 expression in HCC. *Am. J. Transl. Res.* **2015**, *7*, 2254–2261.
- Li, Y.; Tan, W.; Neo, T.W.; Aung, M.O.; Wasser, S.; Lim, S.G.; Tan, T.M. Role of the miR-106b-25 microRNA cluster in hepatocellular carcinoma. *Cancer Sci.* **2009**, *100*, 1234–1242.
- Wang, C.; Wang, X.; Su, Z.; Fei, H.; Liu, X.; Pan, Q. miR-25 promotes hepatocellular carcinoma cell growth, migration and invasion by inhibiting RhoGDI1. *Oncotarget* **2015**, *6*, 36231–36244.
- Shigoka, M.; Tsuchida, A.; Matsudo, T.; Nagakawa, Y.; Saito, H.; Suzuki, Y.; Aoki, T.; Murakami, Y.; Toyoda, H.; Kumada, T.; *et al.* Deregulation of miR-92a expression is implicated in hepatocellular carcinoma development. *Pathol. Int.* **2010**, *60*, 351–357.
- Yang, W.; Dou, C.; Wang, Y.; Jia, Y.; Li, C.; Zheng, X.; Tu, K. MicroRNA-92a contributes to tumor growth of human hepatocellular carcinoma by targeting FBXW7. *Oncol. Rep.* **2015**, *34*, 2576–2584.
- Urtasun, R.; Elizalde, M.; Azkona, M.; Latasa, M.U.; Garcia-Irigoyen, O.; Uriarte, I.; Barrena, M.G.F.; Vicent, S.; Alonso, M.M.; Muntane, J.; *et al.* Splicing regulator SLU7 preserves survival of hepatocellular carcinoma cells and other solid tumors via oncogenic miR-17-92 cluster expression. *Oncogene* **2016**, doi:10.1038/onc.2015.517.

11. Zhu, J.; Feng, A.; Sun, J.; Jiang, Z.; Zhang, G.; Wang, K.; Hu, S.; Qu, X. Increased CD4(+) CD69(+) CD25(-) T cells in patients with hepatocellular carcinoma are associated with tumor progression. *J. Gastroenterol. Hepatol.* **2011**, *26*, 1519–1526.
12. Yang, Y.; Hou, N.; Wang, X.; Wang, L.; Chang, S.; He, K.; Zhao, Z.; Zhao, X.; Song, T.; Huang, C. miR-15b-5p induces endoplasmic reticulum stress and apoptosis in human hepatocellular carcinoma, both *in vitro* and *in vivo*, by suppressing Rab1A. *Oncotarget* **2015**, *6*, 16227–16238.
13. Li, S.; Hou, G.; Wang, Y.; Su, X.; Xue, L. Influence of recombinant human growth hormone (rhGH) on proliferation of hepatocellular carcinoma cells with positive and negative growth hormone receptors *in vitro*. *Tumori* **2010**, *96*, 282–288.
14. Qi, H.L.; Li, C.S.; Qian, C.W.; Xiao, Y.S.; Yuan, Y.F.; Liu, Q.Y.; Liu, Z.S. The long noncoding RNA, EGFR-AS1, a target of GHR, increases the expression of EGFR in hepatocellular carcinoma. *Tumour Biol.* **2015**, *37*, 1079–1089.
15. Liu, J.; Zhang, C.; Lin, M.; Zhu, W.; Liang, Y.; Hong, X.; Zhao, Y.; Young, K.H.; Hu, W.; Feng, Z. Glutaminase 2 negatively regulates the PI3K/AKT signaling and shows tumor suppression activity in human hepatocellular carcinoma. *Oncotarget* **2014**, *5*, 2635–2647.
16. Zhang, J.; Wang, C.; Chen, M.; Cao, J.; Zhong, Y.; Chen, L.; Shen, H.M.; Xia, D. Epigenetic silencing of glutaminase 2 in human liver and colon cancers. *BMC Cancer* **2013**, *13*, 601.
17. Gailhouste, L.; Gomez-Santos, L.; Hagiwara, K.; Hatada, I.; Kitagawa, N.; Kawaharada, K.; Thirion, M.; Kosaka, N.; Takahashi, R.U.; Shibata, T.; *et al.* miR-148a plays a pivotal role in the liver by promoting the hepatospecific phenotype and suppressing the invasiveness of transformed cells. *Hepatology* **2013**, *58*, 1153–1165.
18. Zhou, J.N.; Zeng, Q.; Wang, H.Y.; Zhang, B.; Li, S.T.; Nan, X.; Cao, N.; Fu, C.J.; Yan, X.L.; Jia, Y.L.; *et al.* MicroRNA-125b attenuates epithelial-mesenchymal transitions and targets stem-like liver cancer cells through small mothers against decapentaplegic 2 and 4. *Hepatology* **2015**, *62*, 801–815.
19. Fu, L.; Dong, S.S.; Xie, Y.W.; Tai, L.S.; Chen, L.; Kong, K.L.; Man, K.; Xie, D.; Li, Y.; Cheng, Y.; *et al.* Down-regulation of tyrosine aminotransferase at a frequently deleted region 16q22 contributes to the pathogenesis of hepatocellular carcinoma. *Hepatology* **2010**, *51*, 1624–1634.
20. Jiang, G.; Cui, Y.; Yu, X.; Wu, Z.; Ding, G.; Cao, L. miR-211 suppresses hepatocellular carcinoma by downregulating SATB2. *Oncotarget* **2015**, *6*, 9457–9466.
21. Fan, M.Q.; Huang, C.B.; Gu, Y.; Xiao, Y.; Sheng, J.X.; Zhong, L. Decrease expression of microRNA-20a promotes cancer cell proliferation and predicts poor survival of hepatocellular carcinoma. *J. Exp. Clin. Cancer Res.* **2013**, *32*, 21.
22. Funakoshi, N.; Chaze, I.; Alary, A.S.; Tachon, G.; Cunat, S.; Giansily-Blaizot, M.; Bismuth, M.; Larrey, D.; Pageaux, G.P.; Schved, J.F.; *et al.* The role of genetic factors in patients with hepatocellular carcinoma and iron overload—A prospective series of 234 patients. *Liver Int.* **2015**, *36*, 746–754.
23. Yang, Z.; Zhuang, L.; Szatmary, P.; Wen, L.; Sun, H.; Lu, Y.; Xu, Q.; Chen, X. Upregulation of heat shock proteins (HSPA12A, HSP90B1, HSPA4, HSPA5 and HSPA6) in tumour tissues is associated with poor outcomes from HBV-related early-stage hepatocellular carcinoma. *Int. J. Med. Sci.* **2015**, *12*, 256–263.
24. Wu, J.Q.; Saksena, M.M.; Soriano, V.; Vispo, E.; Saksena, N.K. Differential regulation of cytotoxicity pathway discriminating between HIV, HCV mono- and co-infection identified by transcriptome profiling of PBMCs. *Virology* **2015**, *12*, 4.
25. Xia, H.; Ooi, L.L.; Hui, K.M. MiR-214 targets  $\beta$ -catenin pathway to suppress invasion, stem-like traits and recurrence of human hepatocellular carcinoma. *PLoS ONE* **2012**, *7*, e44206.
26. Tsou, A.P.; Chuang, Y.C.; Su, J.Y.; Yang, C.W.; Liao, Y.L.; Liu, W.K.; Chiu, J.H.; Chou, C.K. Overexpression of a novel imprinted gene, PEG10, in human hepatocellular carcinoma and in regenerating mouse livers. *J. Biomed. Sci.* **2003**, *10 Pt 1*, 625–635.
27. Bang, H.; Ha, S.Y.; Hwang, S.H.; Park, C.K. Expression of PEG10 Is Associated with Poor Survival and Tumor Recurrence in Hepatocellular Carcinoma. *Cancer Res. Treat.* **2015**, *47*, 844–852.
28. Jie, X.; Lang, C.; Jian, Q.; Chaoqun, L.; Dehua, Y.; Yi, S.; Yanping, J.; Luokun, X.; Qiuping, Z.; Hui, W.; *et al.* Androgen activates PEG10 to promote carcinogenesis in hepatic cancer cells. *Oncogene* **2007**, *26*, 5741–5751.
29. Wang, R.; Zhao, N.; Li, S.; Fang, J.H.; Chen, M.X.; Yang, J.; Jia, W.H.; Yuan, Y.; Zhuang, S.M. MicroRNA-195 suppresses angiogenesis and metastasis of hepatocellular carcinoma by inhibiting the expression of VEGF, VAV2, and CDC42. *Hepatology* **2013**, *58*, 642–653.



30. Wang, Y.; Toh, H.C.; Chow, P.; Chung, A.Y.; Meyers, D.J.; Cole, P.A.; Ooi, L.L.; Lee, C.G. MicroRNA-224 is up-regulated in hepatocellular carcinoma through epigenetic mechanisms. *FASEB J.* **2012**, *26*, 3032–3041.
31. Wong, C.M.; Wei, L.; Au, S.L.; Fan, D.N.; Zhou, Y.; Tsang, F.H.; Law, C.T.; Lee, J.M.; He, X.; Shi, J.; *et al.* miR-200b/200c/429 subfamily negatively regulates Rho/ROCK signaling pathway to suppress hepatocellular carcinoma metastasis. *Oncotarget* **2015**, *6*, 13658–13670.
32. Nault, J.C.; Datta, S.; Imbeaud, S.; Franconi, A.; Mallet, M.; Couchy, G.; Letouze, E.; Pilati, C.; Verret, B.; Blanc, J.F.; *et al.* Recurrent AAV2-related insertional mutagenesis in human hepatocellular carcinomas. *Nat. Genet.* **2015**, *47*, 1187–1193.
33. Jain, S.; Singhal, S.; Lee, P.; Xu, R. Molecular genetics of hepatocellular neoplasia. *Am. J. Transl. Res.* **2010**, *2*, 105–118.
34. Wang, B.; Li, D.; Sidler, C.; Rodriguez-Juarez, R.; Singh, N.; Heyns, M.; Ilnytsky, Y.; Bronson, R.T.; Kovalchuk, O. A suppressive role of ionizing radiation-responsive miR-29c in the development of liver carcinoma via targeting WIP1. *Oncotarget* **2015**, *6*, 9937–9950.
35. Yao, J.; Liang, L.; Huang, S.; Ding, J.; Tan, N.; Zhao, Y.; Yan, M.; Ge, C.; Zhang, Z.; Chen, T.; *et al.* MicroRNA-30d promotes tumor invasion and metastasis by targeting Galphai2 in hepatocellular carcinoma. *Hepatology* **2010**, *51*, 846–856.
36. Wang, W.; Lin, H.; Zhou, L.; Zhu, Q.; Gao, S.; Xie, H.; Liu, Z.; Xu, Z.; Wei, J.; Huang, X.; *et al.* MicroRNA-30a-3p inhibits tumor proliferation, invasiveness and metastasis and is downregulated in hep-atocellular carcinoma. *Eur. J. Surg. Oncol.* **2014**, *40*, 1586–1594.
37. Zhong, K.; Chen, K.; Han, L.; Li, B. MicroRNA-30b/c inhibits non-small cell lung cancer cell proliferation by targeting Rab18. *BMC Cancer* **2014**, *14*, 703.
38. Kim, E.H.; Park, A.K.; Dong, S.M.; Ahn, J.H.; Park, W.Y. Global analysis of CpG methylation reveals epigenetic control of the radiosensitivity in lung cancer cell lines. *Oncogene* **2010**, *29*, 4725–4731.
39. Wang, J.; Qian, J.; Hoeksema, M.D.; Zou, Y.; Espinosa, A.V.; Rahman, S.M.; Zhang, B.; Massion, P.P. Integrative genomics analysis identifies candidate drivers at 3q26-29 amplicon in squamous cell carcinoma of the lung. *Clin. Cancer Res.* **2013**, *19*, 5580–5590.
40. Fujimori, S.; Abe, Y.; Nishi, M.; Hamamoto, A.; Inoue, Y.; Ohnishi, Y.; Nishime, C.; Matsumoto, H.; Mazaki, H.Y.; Kijima, H.; *et al.* The subunits of glutamate cysteine ligase enhance cisplatin resistance in human non-small cell lung cancer xenografts *in vivo*. *Int. J. Oncol.* **2004**, *25*, 413–418.
41. Oshika, Y.; Masuda, K.; Tokunaga, T.; Hatanaka, H.; Kamiya, T.; Abe, Y.; Ozeki, Y.; Kijima, H.; Yamazaki, H.; Tamaoki; *et al.* Thrombospondin 2 gene expression is correlated with decreased vascularity in non-small cell lung cancer. *Clin. Cancer Res.* **1998**, *4*, 1785–1788.
42. Song, N.; Liu, B.; Wu, J.L.; Zhang, R.F.; Duan, L.; He, W.S.; Zhang, C.M. Prognostic value of HMGB3 expression in patients with non-small cell lung cancer. *Tumour Biol.* **2013**, *34*, 2599–2603.
43. Tang, Y.N.; Ding, W.Q.; Guo, X.J.; Yuan, X.W.; Wang, D.M.; Song, J.G. Epigenetic regulation of Smad2 and Smad3 by profilin-2 promotes lung cancer growth and metastasis. *Nat. Commun.* **2015**, *6*, 8230.
44. Nakayama, S.; Soejima, K.; Yasuda, H.; Yoda, S.; Satomi, R.; Ikemura, S.; Terai, H.; Sato, T.; Yamaguchi, N.; Hamamoto, J.; *et al.* FOXD1 expression is associated with poor prognosis in non-small cell lung cancer. *Anticancer Res.* **2015**, *35*, 261–268.
45. Chen, G.; Kim, S.H.; King, A.N.; Zhao, L.; Simpson, R.U.; Christensen, P.J.; Wang, Z.; Thomas, D.G.; Giordano, T.J.; Lin, L.; *et al.* CYP24A1 is an independent prognostic marker of survival in patients with lung adenocarcinoma. *Clin. Cancer Res.* **2011**, *17*, 817–826.
46. Chen, Y.; Knosel, T.; Ye, F.; Pacyna-Gengelbach, M.; Deutschmann, N.; Petersen, I. Decreased PITX1 homeobox gene expression in human lung cancer. *Lung Cancer* **2007**, *55*, 287–294.
47. Chen, J.; Ye, L.; Xie, F.; Yang, Y.; Zhang, L.; Jiang, W.G. Expression of bone morphogenetic protein 7 in lung cancer and its biological impact on lung cancer cells. *Anticancer Res.* **2010**, *30*, 1113–1120.
48. Xiong, D.; Li, G.; Li, K.; Xu, Q.; Pan, Z.; Ding, F.; Vedell, P.; Liu, P.; Cui, P.; Hua, X.; *et al.* Exome sequencing identifies MXRA5 as a novel cancer gene frequently mutated in non-small cell lung carcinoma from Chinese patients. *Carcinogenesis* **2012**, *33*, 1797–1805.
49. Ji, X.; Qian, J.; Rahman, J.; Harris, B.; Hoeksema, M.; Chen, H.; Eisenberg, R.; Young, J. Abstract a10: Slc7a11 contributes to the pathogenesis of lung cancer. *Mol. Cancer Res.* **2016**, *14* (Suppl. 1), A10.
50. Liao, Y.; Ni, Y.; He, R.; Liu, W.; Du, J. Clinical implications of fibroblast activation protein- in non-small cell lung cancer after curative resection: A new predictor for prognosis. *J. Cancer Res. Clin. Oncol.* **2013**, *139*, 1523–1528.

51. Jiang, B.Y.; Zhang, X.C.; Su, J.; Meng, W.; Yang, X.N.; Yang, J.J.; Zhou, Q.; Chen, Z.Y.; Chen, Z.H.; Xie, Z.; *et al.* BCL11A overexpression predicts survival and relapse in non-small cell lung cancer and is modulated by microRNA-30a and gene amplification. *Mol. Cancer* **2013**, *12*, 61.
52. Shao, S.; Li, Z.; Gao, W.; Yu, G.; Liu, D.; Pan, F. ADAM-12 as a diagnostic marker for the proliferation, migration and invasion in patients with small cell lung cancer. *PLoS ONE* **2014**, *9*, e85936.
53. Zakaria, N.; Yusoff, N.M.; Zakaria, Z.; Lim, M.N.; Baharuddin, P.J.; Fakiruddin, K.S.; Yahaya, B. Human non-small cell lung cancer expresses putative cancer stem cell markers and exhibits the transcriptomic profile of multipotent cells. *BMC Cancer* **2015**, *15*, 84.
54. Provencio, M.; Sanchez, A. Therapeutic integration of new molecule-targeted therapies with radiotherapy in lung cancer. *Transl. Lung. Cancer Res.* **2014**, *3*, 89–94.
55. Shen, Z.; Chen, B.; Gan, X.; Hu, W.; Zhong, G.; Li, H.; Xie, X.; Liu, Y.; Li, H.; Xu, X.; *et al.* Methylation of neurofilament light polypeptide promoter is associated with cell invasion and metastasis in NSCLC. *Biochem. Biophys. Res. Commun.* **2016**, *470*, 627–634.
56. Haley, J.A.; Haughney, E.; Ullman, E.; Bean, J.; Haley, J.D.; Fink, M.Y. Altered Transcriptional Control Networks with Trans-Differentiation of Isogenic Mutant-KRas NSCLC Models. *Front. Oncol.* **2014**, *4*, 344.
57. Hou, J.; Lambers, M.; den Hamer, B.; den Bakker, M.A.; Hoogsteden, H.C.; Grosveld, F.; Hegmans, J.; Aerts, J.; Philipsen, S. Expression profiling-based subtyping identifies novel non-small cell lung cancer subgroups and implicates putative resistance to pemetrexed therapy. *J. Thorac. Oncol.* **2012**, *7*, 105–114.
58. Ke, Z.; He, W.; Lai, Y.; Guo, X.; Chen, S.; Li, S.; Wang, Y.; Wang, L. Overexpression of collagen triple helix repeat containing 1 (CTHRC1) is associated with tumour aggressiveness and poor prognosis in human non-small cell lung cancer. *Oncotarget* **2014**, *5*, 9410–9424.
59. Zhang, C.; Zhai, S.; Li, X.; Zhang, Q.; Wu, L.; Liu, Y.; Jiang, C.; Zhou, H.; Li, F.; Zhang, S.; *et al.* Synergistic action by multi-targeting compounds produces a potent compound combination for human NSCLC both in vitro and in vivo. *Cell Death Dis.* **2014**, *5*, e1138.
60. Xia, Y.; Zhu, Y.; Ma, T.; Pan, C.; Wang, J.; He, Z.; Li, Z.; Qi, X.; Chen, Y. miR-204 functions as a tumor suppressor by regulating SIX1 in NSCLC. *FEBS Lett.* **2014**, *588*, 3703–3712.
61. Okabe, N.; Ezaki, J.; Yamaura, T.; Muto, S.; Osugi, J.; Tamura, H.; Imai, J.; Ito, E.; Yanagisawa, Y.; Honma, R.; *et al.* FAM83B is a novel biomarker for diagnosis and prognosis of lung squamous cell carcinoma. *Int. J. Oncol.* **2015**, *46*, 999–1006.
62. Yamashita, R.; Sato, M.; Kakumu, T.; Hase, T.; Yogo, N.; Maruyama, E.; Sekido, Y.; Kondo, M.; Hasegawa, Y. Growth inhibitory effects of miR-221 and miR-222 in non-small cell lung cancer cells. *Cancer Med.* **2015**, *4*, 551–564.
63. Su, Y.; Pan, L. Identification of logic relationships between genes and subtypes of non-small cell lung cancer. *PLoS ONE* **2014**, *9*, e94644.
64. Acunzo, M.; Visone, R.; Romano, G.; Veronese, A.; Lovat, F.; Palmieri, D.; Bottoni, A.; Garofalo, M.; Parini, P.G.; Condorelli, G.; *et al.* miR-130a targets MET and induces TRAIL-sensitivity in NSCLC by downregulating miR-221 and 222. *Oncogene* **2012**, *31*, 634–642.
65. Kim, S.J.; Hwang, S.H.; Kim, I.J.; Lee, M.K.; Lee, C.H.; Lee, S.Y.; Lee, E.Y. The association of 18F-deoxyglucose (FDG) uptake of PET with polymorphisms in the glucose transporter gene (SLC2A1) and hypoxia-related genes (HIF1A, VEGFA, APEX1) in non-small cell lung cancer. SLC2A1 polymorphisms and FDG-PET in NSCLC patients. *J. Exp. Clin. Cancer Res.* **2010**, *29*, 69.
66. Watanabe, H.; Imaizumi, M.; Ojika, T.; Abe, T.; Hida, T.; Kato, K. Evaluation of biological characteristics of lung cancer by the human 28 kDa vitamin D-dependent calcium binding protein, calbindin-D28k. *Jpn. J. Clin. Oncol.* **1994**, *24*, 121–127.
67. Iacono, M.L.; Monica, V.; Saviozzi, S.; Ceppi, P.; Bracco, E.; Papotti, M.; Scagliotti, G.V. p63 and p73 isoform expression in non-small cell lung cancer and corresponding morphological normal lung tissue. *J. Thorac. Oncol.* **2011**, *6*, 473–481.
68. Rosen, S.D.; Lemjabbar-Alaoui, H. Sulf-2: An extracellular modulator of cell signaling and a cancer target candidate. *Expert Opin. Ther. Targets* **2010**, *14*, 935–949.
69. Chen, C.H.; Lai, J.M.; Chou, T.Y.; Chen, C.Y.; Su, L.J.; Lee, Y.C.; Cheng, T.S.; Hong, Y.R.; Chou, C.K.; Whang-Peng, J.; *et al.* VEGFA upregulates FLJ10540 and modulates migration and invasion of lung cancer via PI3K/AKT pathway. *PLoS ONE* **2009**, *4*, e5052.

70. Liu, J.; Lu, K.H.; Liu, Z.L.; Sun, M.; De, W.; Wang, Z.X. MicroRNA-100 is a potential molecular marker of non-small cell lung cancer and functions as a tumor suppressor by targeting polo-like kinase 1. *BMC Cancer* **2012**, *12*, 519.
71. Shinmura, K.; Kato, H.; Matsuura, S.; Inoue, Y.; Igarashi, H.; Nagura, K.; Nakamura, S.; Maruyama, K.; Tajima, M.; Funai, K.; *et al.* A novel somatic FGFR3 mutation in primary lung cancer. *Oncol. Rep.* **2014**, *31*, 1219–1224.
72. Nian, W.; Ao, X.; Wu, Y.; Huang, Y.; Shao, J.; Wang, Y.; Chen, Z.; Chen, F.; Wang, D. miR-223 functions as a potent tumor suppressor of the Lewis lung carcinoma cell line by targeting insulin-like growth factor-1 receptor and cyclin-dependent kinase 2. *Oncol. Lett.* **2013**, *6*, 359–366.
73. Justilien, V.; Jameison, L.; Der, C.J.; Rossman, K.L.; Fields, A.P. Oncogenic activity of Ect2 is regulated through protein kinase C iota-mediated phosphorylation. *J. Biol. Chem.* **2011**, *286*, 8149–8157.
74. Xia, H.; Sun, S.; Wang, B.; Wang, T.; Liang, C.; Li, G.; Huang, C.; Qi, D.; Chu, X. miR-143 inhibits NSCLC cell growth and metastasis by targeting Limk1. *Int. J. Mol. Sci.* **2014**, *15*, 11973–11983.
75. Hofmann, H.S.; Bartling, B.; Simm, A.; Murray, R.; Aziz, N.; Hansen, G.; Silber, R.E.; Burdach, S. Identification and classification of differentially expressed genes in non-small cell lung cancer by expression profiling on a global human 59.620-element oligonucleotide array. *Oncol. Rep.* **2006**, *16*, 587–595.
76. Watanabe, T.; Miura, T.; Degawa, Y.; Fujita, Y.; Inoue, M.; Kawaguchi, M.; Furihata, C. Comparison of lung cancer cell lines representing four histopathological subtypes with gene expression profiling using quantitative real-time PCR. *Cancer Cell Int.* **2010**, *10*, 2.
77. Li, X.; Liu, X.; Xu, Y.; Liu, J.; Xie, M.; Ni, W.; Chen, S. KLF5 promotes hypoxia-induced survival and inhibits apoptosis in non-small cell lung cancer cells via HIF-1. *Int. J. Oncol.* **2014**, *45*, 1507–1514.
78. Huang, Y.; Dai, Z.; Barbacioru, C.; Sadee, W. Cystine-glutamate transporter SLC7A11 in cancer chemosensitivity and chemoresistance. *Cancer Res.* **2005**, *65*, 7446–7454.
79. Fu, J.; Khaybullin, R.; Liang, X.; Morin, M.; Xia, A.; Yeh, A.; Qi, X. Discovery of Gene Regulation Pattern in Lung Cancer by Gene Expression Profiling Using Human Tissues. *Genom. Data* **2015**, *3*, 112–115.
80. Chen, R.; Khatri, P.; Mazur, P.K.; Polin, M.; Zheng, Y.; Vaka, D.; Hoang, C.D.; Shrager, J.; Xu, Y.; Vicent, S.; *et al.* A meta-analysis of lung cancer gene expression identifies PTK7 as a survival gene in lung adenocarcinoma. *Cancer Res.* **2014**, *74*, 2892–2902.
81. Chen, Z.; Zeng, H.; Guo, Y.; Liu, P.; Pan, H.; Deng, A.; Hu, J. miRNA-145 inhibits non-small cell lung cancer cell proliferation by targeting c-Myc. *J. Exp. Clin. Cancer Res.* **2010**, *29*, 151.
82. Wangari-Talbot, J.; Hopper-Borge, E. Drug Resistance Mechanisms in Non-Small Cell Lung Carcinoma. *J. Can. Res. Updates* **2013**, *2*, 265–282.
83. Racz, A.; Brass, N.; Heckel, D.; Pahl, S.; Remberger, K.; Meese, E. Expression analysis of genes at 3q26-q27 involved in frequent amplification in squamous cell lung carcinoma. *Eur. J. Cancer* **1999**, *35*, 641–646.
84. Yang, Y.; Wu, J.; Cai, J.; He, Z.; Yuan, J.; Zhu, X.; Li, Y.; Li, M.; Guan, H. PSAT1 regulates cyclin D1 degradation and sustains proliferation of non-small cell lung cancer cells. *Int. J. Cancer* **2015**, *136*, 39–50.
85. Li, Y.; Chao, Y.; Fang, Y.; Wang, J.; Wang, M.; Zhang, H.; Ying, M.; Zhu, X.; Wang, H. MTA1 promotes the invasion and migration of non-small cell lung cancer cells by downregulating miR-125b. *J. Exp. Clin. Cancer Res.* **2013**, *32*, 33.
86. Kren, L.; Goncharuk, V.N.; Krenova, Z.; Stratil, D.; Hermanova, M.; Skrickova, J.; Sheehan, C.E.; Ross, J.S. Expression of matrix metalloproteinases 3, 10 and 11 (stromelysins 1, 2 and 3) and matrix metalloproteinase 7 (matrilysin) by cancer cells in non-small cell lung neoplasms. Clinicopathologic studies. *Cesk Patol.* **2006**, *42*, 16–19.
87. Liu, B.; Qu, J.; Xu, F.; Guo, Y.; Wang, Y.; Yu, H.; Qian, B. MiR-195 suppresses non-small cell lung cancer by targeting CHEK1. *Oncotarget* **2015**, *6*, 9445–9456.
88. Suzuki, C.; Daigo, Y.; Ishikawa, N.; Kato, T.; Hayama, S.; Ito, T.; Tsuchiya, E.; Nakamura, Y. ANLN plays a critical role in human lung carcinogenesis through the activation of RHOA and by involvement in the phosphoinositide 3-kinase/AKT pathway. *Cancer Res.* **2005**, *65*, 11314–11325.
89. Bulk, E.; Ay, A.S.; Hammadi, M.; Ouadid-Ahidouch, H.; Schelhaas, S.; Hascher, A.; Rohde, C.; Thoennissen, N.H.; Wiewrodt, R.; Schmidt, E.; *et al.* Epigenetic dysregulation of KCa 3.1 channels induces poor prognosis in lung cancer. *Int. J. Cancer* **2015**, *137*, 1306–1317.
90. Chang, D.H.; Rutledge, J.R.; Patel, A.A.; Heerdt, B.G.; Augenlicht, L.H.; Korst, R.J. The effect of lung cancer on cytokine expression in peripheral blood mononuclear cells. *PLoS ONE* **2013**, *8*, e64456.

91. Kato, T.; Wada, H.; Patel, P.; Hu, H.P.; Lee, D.; Ujii, H.; Hirohashi, K.; Nakajima, T.; Sato, M.; Kaji, M.; *et al.* Overexpression of KIF23 predicts clinical outcome in primary lung cancer patients. *Lung Cancer* **2016**, *92*, 53–61.
92. Nishigaki, Y.; Ohsaki, Y.; Toyoshima, E.; Kikuchi, K. Increased serum and urinary levels of a parathyroid hormone-related protein COOH terminus in non-small cell lung cancer patients. *Clin. Cancer Res.* **1999**, *5*, 1473–1481.
93. Meyer, B.; Loeschke, S.; Schultze, A.; Weigel, T.; Sandkamp, M.; Goldmann, T.; Vollmer, E.; Bullerdiek, J. HMGA2 overexpression in non-small cell lung cancer. *Mol. Carcinog.* **2007**, *46*, 503–511.
94. Gugger, M.; White, R.; Song, S.; Waser, B.; Cescato, R.; Riviere, P.; Reubi, J.C. GPR87 is an overexpressed G-protein coupled receptor in squamous cell carcinoma of the lung. *Dis. Markers* **2008**, *24*, 41–50.
95. Benlloch, S.; Galbis, J.; Peiro, F.M.; Alenda, C.; Rodriguez-Paniagua, J.M.; Sanchez-Paya, J.; Romero, S.; Ciriquian, J.L.M.; Massuti, B. Role of cea, plunc and ck19 mrna expression in lymph nodes from resected stage i non-small cell lung cancer (nscl) patients (p) as markers of occult micrometastasis. A pilot study. *J. Clin. Oncol.* **2005**, *23*, 9654.
96. Ji, Y.; Xie, M.; Lan, H.; Zhang, Y.; Long, Y.; Weng, H.; Li, D.; Cai, W.; Zhu, H.; Niu, Y.; *et al.* PRR11 is a novel gene implicated in cell cycle progression and lung cancer. *Int. J. Biochem. Cell Biol.* **2013**, *45*, 645–656.
97. Ziegler, A.; Cerciello, F.; Bigosch, C.; Bausch-Fluck, D.; Felley-Bosco, E.; Ossola, R.; Soltermann, A.; Stahel, R.A.; Wollscheid, B. Proteomic surfaceome analysis of mesothelioma. *Lung Cancer* **2012**, *75*, 189–196.
98. Yang, Y.; Zhang, P.; Zhao, Y.; Yang, J.; Jiang, G.; Fan, J. Decreased MicroRNA-26a expression causes cisplatin resistance in human non-small cell lung cancer. *Cancer Biol. Ther.* **2015**, in press.
99. Zhou, W.; Yin, M.; Cui, H.; Wang, N.; Zhao, L.L.; Yuan, L.Z.; Yang, X.P.; Ding, X.M.; Men, F.Z.; Ma, X.; *et al.* Identification of potential therapeutic target genes and mechanisms in non-small-cell lung carcinoma in non-smoking women based on bioinformatics analysis. *Eur. Rev. Med. Pharmacol. Sci.* **2015**, *19*, 3375–3384.
100. Davidson, A. Plod2 and ttf1 expression as prognostic variables in selection for adjuvant treatment in early stage lung adenocarcinoma. *J. Thorac. Oncol.* **2007**, *2*, S518.
101. Kane, S.; Prentice, M.A.; Mariano, J.M.; Cuttitta, F.; Jakowlew, S.B. Differential induction of early response genes by adrenomedullin and transforming growth factor-beta1 in human lung cancer cells. *Anticancer Res.* **2002**, *22*, 1433–1444.
102. Zhan, P.; Shen, X.K.; Qian, Q.; Zhu, J.P.; Zhang, Y.; Xie, H.Y.; Xu, C.H.; Hao, K.K.; Hu, W.; Xia, N.; *et al.* Down-regulation of lysyl oxidase-like 2 (LOXL2) is associated with disease progression in lung adenocarcinomas. *Med. Oncol.* **2012**, *29*, 648–655.
103. Wang, K.K.; Liu, N.; Radulovich, N.; Wigle, D.A.; Johnston, M.R.; Shepherd, F.A.; Minden, M.D.; Tsao, M.S. Novel candidate tumor marker genes for lung adenocarcinoma. *Oncogene* **2002**, *21*, 7598–7604.
104. Sanchez-Palencia, A.; Gomez-Morales, M.; Gomez-Capilla, J.A.; Pedraza, V.; Boyero, L.; Rosell, R.; Farez-Vidal, M.E. Gene expression profiling reveals novel biomarkers in nonsmall cell lung cancer. *Int. J. Cancer* **2011**, *129*, 355–364.
105. Yao, L.; Sun, B.; Zhao, X.; Zhao, X.; Gu, Q.; Dong, X.; Zheng, Y.; Sun, J.; Cheng, R.; Qi, H.; *et al.* Overexpression of Wnt5a promotes angiogenesis in NSCLC. *BioMed Res. Int.* **2014**, *2014*, 832562.
106. Jin, M.M.; Ye, Y.Z.; Qian, Z.D.; Zhang, Y.B. Notch signaling molecules as prognostic biomarkers for non-small cell lung cancer. *Oncol. Lett.* **2015**, *10*, 3252–3260.
107. Chow, G.; Tauler, J.; Mulshine, J.L. Cytokines and growth factors stimulate hyaluronan production: Role of hyaluronan in epithelial to mesenchymal-like transition in non-small cell lung cancer. *J. Biomed. Biotechnol.* **2010**, *2010*, 485468.
108. Fabbri, M.; Garzon, R.; Cimmino, A.; Liu, Z.; Zanesi, N.; Callegari, E.; Liu, S.; Alder, H.; Costinean, S.; Fernandez-Cymering, C.; *et al.* MicroRNA-29 family reverts aberrant methylation in lung cancer by targeting DNA methyltransferases 3A and 3B. *Proc. Natl. Acad. Sci. USA* **2007**, *104*, 15805–15810.
109. Lonergan, K.M.; Chari, R.; Coe, B.P.; Wilson, I.M.; Tsao, M.S.; Ng, R.T.; Macaulay, C.; Lam, S.; Lam, W.L. Transcriptome profiles of carcinoma-in-situ and invasive non-small cell lung cancer as revealed by SAGE. *PLoS ONE* **2010**, *5*, e9162.
110. Savci-Heijink, C.D.; Kosari, F.; Aubry, M.C.; Caron, B.L.; Sun, Z.; Yang, P.; Vasmatzis, G. The role of desmoglein-3 in the diagnosis of squamous cell carcinoma of the lung. *Am. J. Pathol.* **2009**, *174*, 1629–1637.
111. Guan, P.; Huang, D.; He, M.; Zhou, B. Lung cancer gene expression database analysis incorporating prior knowledge with support vector machine-based classification method. *J. Exp. Clin. Cancer Res.* **2009**, *28*, 103.

112. Xie, X.; Liu, H.T.; Mei, J.; Ding, F.B.; Xiao, H.B.; Hu, F.Q.; Hu, R.; Wang, M.S. miR-106a promotes growth and metastasis of non-small cell lung cancer by targeting PTEN. *Int. J. Clin. Exp. Pathol.* **2015**, *8*, 3827–3834.
113. Osada, H.; Takahashi, T. let-7 and miR-17-92: small-sized major players in lung cancer development. *Cancer Sci.* **2011**, *102*, 9–17.
114. Lin, J.; Marquardt, G.; Mullapudi, N.; Wang, T.; Han, W.; Shi, M.; Keller, S.; Zhu, C.; Locker, J.; Spivack, S.D. Lung cancer transcriptomes refined with laser capture microdissection. *Am. J. Pathol.* **2014**, *184*, 2868–2884.
115. Song, Y.F.; Hong, J.F.; Liu, D.L.; Lin, Q.A.; Lan, X.P.; Lai, G.X. miR-630 targets LMO3 to regulate cell growth and metastasis in lung cancer. *Am. J. Transl. Res.* **2015**, *7*, 1271–1279.
116. Cao, C.; Zhang, M.; Gao, R.; Cress, D.; Chen, Z.; Wu, L.; Kaye, M.Z.; Kaye, F. Abstract 3105: Orphan nuclear receptor nr4a2 exhibits oncogenic activity in lung cancer cells. *Cancer Res.* **2013**, *73* (Suppl. 8), 3105.
117. Xinjian Wang, David Balli, Tien Le, Vladimir V. Kalinichenko, and Tatiana V. Kalin. Abstract a60: Foxf1 transcription factor drives progression of benign lung adenomas to malignant adenocarcinomas. *Cancer Res.* **2013**, *73* (Suppl. 3), A60.
118. Jeon, H.S.; Dracheva, T.; Yang, S.H.; Meerzaman, D.; Fukuoka, J.; Shakoori, A.; Shilo, K.; Travis, W.D.; , J. SMAD6 contributes to patient survival in non-small cell lung cancer and its knockdown reestablishes TGF-beta homeostasis in lung cancer cells. *Cancer Res.* **2008**, *68*, 9686–9692.
119. Carrega, P.; Morandi, B.; Costa, R.; Frumento, G.; Forte, G.; Altavilla, G.; Ratto, G.B.; Mingari, M.C.; Moretta, L.; Ferlazzo, G. Natural killer cells infiltrating human nonsmall-cell lung cancer are enriched in CD56 bright CD16(-) cells and display an impaired capability to kill tumor cells. *Cancer* **2008**, *112*, 863–875.
120. Healy, K.D.; Hodgson, L.; Kim, T.Y.; Shutes, A.; Maddileti, S.; Juliano, R.L.; Hahn, K.M.; Harden, T.K.; Bang, Y.J.; der, C.J. DLC-1 suppresses non-small cell lung cancer growth and invasion by RhoGAP-dependent and independent mechanisms. *Mol. Carcinog.* **2008**, *47*, 326–337.
121. Liu, N.; Dong, Q.-Z.; Wang, E.-H. Expression of tbx3 is correlated with tumor proliferation and invasion in non-small cell lung cancer. *J. China Med. Univ.* **2012**, *41*, 360.
122. Jiang, C.P.; Wu, B.H.; Chen, S.P.; Fu, M.Y.; Yang, M.; Liu, F.; Wang, B.Q. High COL4A3 expression correlates with poor prognosis after cisplatin plus gemcitabine chemotherapy in non-small cell lung cancer. *Tumour Biol.* **2013**, *34*, 415–420.
123. Kim, G.J. Characterization and Regulation of Stearoyl-CoA Desaturase 5. Ph.D. Thesis, The State University of New Jersey, New Brunswick, NJ, USA, October 2011.
124. Liu, J.; Lee, W.; Jiang, Z.; Chen, Z.; Jhunjunwala, S.; Haverty, P.M.; Gnad, F.; Guan, Y.; Gilbert, H.N.; Stinson, J.; et al. Genome and transcriptome sequencing of lung cancers reveal diverse mutational and splicing events. *Genome Res.* **2012**, *22*, 2315–2327.
125. Sakashita, H.; Inoue, H.; Akamine, S.; Ishida, T.; Inase, N.; Shirao, K.; Mori, M.; Mimori, K. Identification of the NEDD4L gene as a prognostic marker by integrated microarray analysis of copy number and gene expression profiling in non-small cell lung cancer. *Ann. Surg. Oncol.* **2013**, *20* (Suppl. 3), S590–S598.
126. Rudin, C.M.; Durinck, S.; Stawiski, E.W.; Poirier, J.T.; Modrusan, Z.; Shames, D.S.; Bergbower, E.A.; Guan, Y.; Shin, J.; Guillory, J.; et al. Comprehensive genomic analysis identifies SOX2 as a frequently amplified gene in small-cell lung cancer. *Nat. Genet.* **2012**, *44*, 1111–1116.
127. Tejero, R.; Navarro, A.; Campayo, M.; Vinolas, N.; Marrades, R.M.; Cordeiro, A.; Ruiz-Martinez, M.; tasmusagna, S.S.; Molins, L.; Ramirez, J.; et al. miR-141 and miR-200c as markers of overall survival in early stage non-small cell lung cancer adenocarcinoma. *PLoS ONE* **2014**, *9*, e101899.
128. Pacurari, M.; Addison, J.B.; Bondalapati, N.; Wan, Y.W.; Luo, D.; Qian, Y.; Castranova, V.; Ivanov, A.V.; Guo, N.L. The microRNA-200 family targets multiple non-small cell lung cancer prognostic markers in H1299 cells and BEAS-2B cells. *Int. J. Oncol.* **2013**, *43*, 548–560.
129. Tan, X.; Chen, M. MYLK and MYL9 expression in non-small cell lung cancer identified by bioinformatics analysis of public expression data. *Tumour Biol.* **2014**, *35*, 12189–12200.
130. Li, Y.; Zhang, D.; Chen, C.; Ruan, Z.; Li, Y.; Huang, Y. MicroRNA-212 displays tumor-promoting properties in non-small cell lung cancer cells and targets the hedgehog pathway receptor PTCH1. *Mol. Biol. Cell* **2012**, *23*, 1423–1434.
131. Cheung, W.K.; Zhao, M.; Liu, Z.; Stevens, L.E.; Cao, P.D.; Fang, J.E.; Westbrook, T.F.; Nguyen, D.X. Control of alveolar differentiation by the lineage transcription factors GATA6 and HOPX inhibits lung adenocarcinoma metastasis. *Cancer Cell* **2013**, *23*, 725–738.

132. Basseres, D.S.; D'Alo, F.; Yeap, B.Y.; Lowenberg, E.C.; Gonzalez, D.A.; Yasuda, H.; Dayaram, T.; Kocher, O.N.; Godleski, J.J.; Richards, W.G.; *et al.* Frequent downregulation of the transcription factor Foxa2 in lung cancer through epigenetic silencing. *Lung Cancer* **2012**, *77*, 31–37.
133. Dong, W.; Yao, C.; Teng, X.; Chai, J.; Yang, X.; Li, B. MiR-140-3p suppressed cell growth and invasion by downregulating the expression of ATP8A1 in non-small cell lung cancer. *Tumour Biol.* **2015**, *37*, 2973–2985.
134. Urgard, E.; Vooder, T.; Vosa, U.; Valk, K.; Liu, M.; Luo, C.; Hoti, F.; Roosipuu, R.; Annilo, T.; Laine, J.; *et al.* Metagenes associated with survival in non-small cell lung cancer. *Cancer Inform.* **2011**, *10*, 175–183.
135. Liu, H.-X.; Bai, Y.-F.; Wu, X.-X.; Guo, L.-L. Expressions and clinical significance of protocadherin 9 and cyclin d1 in non-small cell lung cancer patients. *Chin. J. Cancer Prev. Treat.* **2014**, *21*, doi:10.1515/cclm-2015-0776.
136. Balgouranidou, I.; Chimonidou, M.; Milaki, G.; Tsaroucha, E.; Kakolyris, S.; Georgoulas, V.; Lianidou, E. SOX17 promoter methylation in plasma circulating tumor DNA of patients with non-small cell lung cancer. *Clin. Chem. Lab. Med.* **2016**, doi:10.1515/cclm-2015-0776.
137. Nasarre, P.; Potiron, V.; Drabkin, H.; Roche, J. Guidance molecules in lung cancer. *Cell Adh Migr.* **2010**, *4*, 130–145.
138. Jones, D.R.; Moskaluk, C.A.; Gillenwater, H.H.; Petroni, G.R.; Burks, S.G.; Philips, J.; Rehm, P.K.; Olazagasti, J.; Kozower, B.D.; Bao, Y. Phase I trial of induction histone deacetylase and proteasome inhibition followed by surgery in non-small-cell lung cancer. *J. Thorac. Oncol.* **2012**, *7*, 1683–1690.
139. Li, M.; Qiu, M.; Xu, Y.; Mao, Q.; Wang, J.; Dong, G.; Xia, W.; Yin, R.; Xu, L. Differentially expressed protein-coding genes and long noncoding RNA in early-stage lung cancer. *Tumour Biol.* **2015**, *36*, 9969–9978.
140. Wang, H.M.; Liao, Z.X.; Komaki, R.; Welsh, J.W.; O'Reilly, M.S.; Chang, J.Y.; Zhuang, Y.; Levy, L.B.; Lu, C.; Gomez, D.R. Improved survival outcomes with the incidental use of beta-blockers among patients with non-small-cell lung cancer treated with definitive radiation therapy. *Ann. Oncol.* **2013**, *24*, 1312–1319.
141. Li, J.; Tan, Q.; Yan, M.; Liu, L.; Lin, H.; Zhao, F.; Bao, G.; Kong, H.; Ge, C.; Zhang, F.; *et al.* miRNA-200c inhibits invasion and metastasis of human non-small cell lung cancer by directly targeting ubiquitin specific peptidase 25. *Mol. Cancer* **2014**, *13*, 166.
142. Moncho-Amor, V.; de Caceres, I.I.; Bandres, E.; Martinez-Poveda, B.; Orgaz, J.L.; Sanchez-Perez, I.; Zazo, S.; Rovira, A.; Albanell, J.; Jimenez, B.; *et al.* DUSP1/MKP1 promotes angiogenesis, invasion and metastasis in non-small-cell lung cancer. *Oncogene* **2011**, *30*, 668–678.
143. Niu, C.; Liang, C.; Guo, J.; Cheng, L.; Zhang, H.; Qin, X.; Zhang, Q.; Ding, L.; Yuan, B.; Xu, X.; *et al.* Downregulation and growth inhibitory role of FHL1 in lung cancer. *Int. J. Cancer* **2012**, *130*, 2549–2556.
144. Song, S.; Walter, V.; Karaca, M.; Li, Y.; Bartlett, C.S.; Smiraglia, D.J.; Serber, D.; Sproul, C.D.; Plass, C.; Zhang, J.; *et al.* Gene silencing associated with SWI/SNF complex loss during NSCLC development. *Mol. Cancer Res.* **2014**, *12*, 560–570.
145. Han, N.; Yuan, X.; Wu, H.; Xu, H.; Chu, Q.; Guo, M.; Yu, S.; Chen, Y.; Wu, K. DACH1 inhibits lung adenocarcinoma invasion and tumor growth by repressing CXCL5 signaling. *Oncotarget* **2015**, *6*, 5877–5888.
146. Hasan, A.N.; Ahmad, M.W.; Madar, I.H.; Grace, B.L.; Hasan, T.N. An in silico analytical study of lung cancer and smokers datasets from gene expression omnibus (GEO) for prediction of differentially expressed genes. *Bioinformatics* **2015**, *11*, 229–235.
147. Chen, L.; Zhuo, D.; Chen, J.; Yuan, H. Screening feature genes of lung carcinoma with DNA microarray analysis. *Int. J. Clin. Exp. Med.* **2015**, *8*, 12161–12171.
148. Vaira, V.; Favarsani, A.; Martin, N.M.; Garlick, D.S.; Ferrero, S.; Nosotti, M.; Kissil, J.L.; Bosari, S.; Altieri, D.C. Regulation of lung cancer metastasis by Klf4-Numb-like signaling. *Cancer Res.* **2013**, *73*, 2695–2705.
149. Pandiri, A.R.; Sills, R.C.; Ziglioli, V.; Ton, T.V.; Hong, H.H.; Lahousse, S.A.; Gerrish, K.E.; Auerbach, S.S.; Shockley, K.R.; Bushel, P.R.; *et al.* Differential transcriptomic analysis of spontaneous lung tumors in B6C3F1 mice: comparison to human non-small cell lung cancer. *Toxicol. Pathol.* **2012**, *40*, 1141–1159.
150. Selamat, S.A.; Chung, B.S.; Girard, L.; Zhang, W.; Zhang, Y.; Campan, M.; Siegmund, K.D.; Koss, M.N.; Hagen, J.A.; Lam, W.L.; *et al.* Genome-scale analysis of DNA methylation in lung adenocarcinoma and integration with mRNA expression. *Genome Res.* **2012**, *22*, 1197–1211.
151. Cai, J.; Fang, L.; Huang, Y.; Li, R.; Yuan, J.; Yang, Y.; Zhu, X.; Chen, B.; Wu, J.; Li, M. miR-205 targets PTEN and PHLPP2 to augment AKT signaling and drive malignant phenotypes in non-small cell lung cancer. *Cancer Res.* **2013**, *73*, 5402–5415.
152. Wu, M.; Tu, T.; Huang, Y.; Cao, Y. Suppression subtractive hybridization identified differentially expressed genes in lung adenocarcinoma: ERGIC3 as a novel lung cancer-related gene. *BMC Cancer* **2013**, *13*, 44.

153. Yang, Y.; Meng, H.; Peng, Q.; Yang, X.; Gan, R.; Zhao, L.; Chen, Z.; Lu, J.; Meng, Q.H. Downregulation of microRNA-21 expression restrains non-small cell lung cancer cell proliferation and migration through upregulation of programmed cell death 4. *Cancer Gene Ther.* **2015**, *22*, 23–29.
154. Tomida, S.; Koshikawa, K.; Yatabe, Y.; Harano, T.; Ogura, N.; Mitsudomi, T.; Some, M.; Yanagisawa, K.; Takahashi, T.; Osada, H.; *et al.* Gene expression-based, individualized outcome prediction for surgically treated lung cancer patients. *Oncogene* **2004**, *23*, 5360–5370.
155. Jiang, L.; Jiang, S.; Lin, Y.; Yang, H.; Zhao, Z.; Xie, Z.; Lin, Y.; Long, H. Combination of body mass index and oxidized low density lipoprotein receptor 1 in prognosis prediction of patients with squamous non-small cell lung cancer. *Oncotarget* **2015**, *6*, 22072–22080.
156. Hayano, T.; Garg, M.; Yin, D.; Sudo, M.; Kawamata, N.; Shi, S.; Chien, W.; Ding, L.W.; Leong, G.; Mori, S.; *et al.* SOX7 is down-regulated in lung cancer. *J. Exp. Clin. Cancer Res.* **2013**, *32*, 17.
157. Wu, C.; Cao, Y.; He, Z.; He, J.; Hu, C.; Duan, H.; Jiang, J. Serum levels of miR-19b and miR-146a as prognostic biomarkers for non-small cell lung cancer. *Tohoku J. Exp. Med.* **2014**, *232*, 85–95.
158. Park, K.S.; Kim, H.K.; Lee, J.H.; Choi, Y.B.; Park, S.Y.; Yang, S.H.; Kim, S.Y.; Hong, K.M. Transglutaminase 2 as a cisplatin resistance marker in non-small cell lung cancer. *J. Cancer Res. Clin. Oncol.* **2010**, *136*, 493–502.
159. Chen, S.C.; Lin, C.Y.; Chen, Y.H.; Fang, H.Y.; Cheng, C.Y.; Chang, C.W.; Chen, R.A.; Tai, H.L.; Lee, C.H.; Chou, M.C.; *et al.* Aberrant promoter methylation of EDNRB in lung cancer in Taiwan. *Oncol. Rep.* **2006**, *15*, 167–172.
160. Karlsson, T.; Kvarnbrink, S.; Holmlund, C.; Botling, J.; Micke, P.; Johansson, M.; Henriksson, R.; Hedman, H. Abstract 5315: Interactions between Irig proteins and lmo7 and the expression of lmo7 in human lung cancer. *Cancer Res.* **2013**, *73* (Suppl. 8), 5315.
161. Zhan, Q.; Huang, R.F.; Liang, X.H.; Ge, M.X.; Jiang, J.W.; Lin, H.; Zhou, X.L. FRAS1 knockdown reduces A549 cells migration and invasion through downregulation of FAK signaling. *Int. J. Clin. Exp. Med.* **2014**, *7*, 1692–1697.
162. Zhang, K.; Dai, L.; Zhang, B.; Xu, X.; Shi, J.; Fu, L.; Chen, X.; Li, J.; Bai, Y. miR-203 is a direct transcriptional target of E2F1 and causes G1 arrest in esophageal cancer cells. *J. Cell. Physiol.* **2015**, *230*, 903–910.
163. Guo, Y.; Chen, Z.; Zhang, L.; Zhou, F.; Shi, S.; Feng, X.; Li, B.; Meng, X.; Ma, X.; Luo, M.; *et al.* Distinctive microRNA profiles relating to patient survival in esophageal squamous cell carcinoma. *Cancer Res.* **2008**, *68*, 26–33.
164. Li, C.; Li, Z.; Zhu, M.; Zhao, T.; Chen, L.; Ji, W.; Chen, H.; Su, C. Clinicopathological and prognostic significance of survivin over-expression in patients with esophageal squamous cell carcinoma: A meta-analysis. *PLoS ONE* **2012**, *7*, e44764.
165. Thepot, A.; Hautefeuille, A.; Cros, M.P.; Abedi-Ardekani, B.; Petre, A.; Damour, O.; Krutovskikh, V.; Hainaut, P. Intraepithelial p63-dependent expression of distinct components of cell adhesion complexes in normal esophageal mucosa and squamous cell carcinoma. *Int. J. Cancer* **2010**, *127*, 2051–2062.
166. Wu, C.; Li, M.; Hu, C.; Duan, H. Clinical significance of serum miR-223, miR-25 and miR-375 in patients with esophageal squamous cell carcinoma. *Mol. Biol. Rep.* **2014**, *41*, 1257–1266.
167. Kurashige, J.; Watanabe, M.; Iwatsuki, M.; Kinoshita, K.; Saito, S.; Hiyoshi, Y.; Kamohara, H.; Baba, Y.; Mimori, K.; Baba, H. Overexpression of microRNA-223 regulates the ubiquitin ligase FBXW7 in oesophageal squamous cell carcinoma. *Br. J. Cancer* **2012**, *106*, 182–188.
168. Sawada, G.; Niida, A.; Hirata, H.; Komatsu, H.; Uchi, R.; Shimamura, T.; Takahashi, Y.; Kurashige, J.; Matsumura, T.; Ueo, H.; *et al.* An Integrative Analysis to Identify Driver Genes in Esophageal Squamous Cell Carcinoma. *PLoS ONE* **2015**, *10*, e0139808.
169. Sun, M.; Ju, H.; Zhou, Z.; Zhu, R. Pilot genome-wide study of tandem 3' UTRs in esophageal cancer using high-throughput sequencing. *Mol. Med. Rep.* **2014**, *9*, 1597–1605.
170. Rane, J.K.; Scaravilli, M.; Ylipaa, A.; Pellacani, D.; Mann, V.M.; Simms, M.S.; Nykter, M.; Collins, A.T.; Visakorpi, Maitland, N.J. MicroRNA expression profile of primary prostate cancer stem cells as a source of biomarkers and therapeutic targets. *Eur. Urol.* **2015**, *67*, 7–10.
171. Cencic, R.; Carrier, M.; Galicia-Vazquez, G.; Bordeleau, M.E.; Sukarieh, R.; Bourdeau, A.; Brem, B.; Teodoro, J.G.; Greger, H.; Tremblay, M.L.; *et al.* Antitumor activity and mechanism of action of the cyclopenta[b]benzofuran, silvestrol. *PLoS ONE* **2009**, *4*, e5223.
172. Miller, G.J.; Miller, H.L.; van Bokhoven, A.; Lambert, J.R.; Werahera, P.N.; Schirripa, O.; Lucia, M.S.; Nordeen, S.K. Aberrant HOXC expression accompanies the malignant phenotype in human prostate. *Cancer Res.* **2003**, *63*, 5879–5888.

173. Larne, O.; Hagman, Z.; Lilja, H.; Bjartell, A.; Edsjo, A.; Ceder, Y. miR-145 suppress the androgen receptor in prostate cancer cells and correlates to prostate cancer prognosis. *Carcinogenesis* **2015**, *36*, 858–866.
174. Johnson, I.R.; Parkinson-Lawrence, E.J.; Shandala, T.; Weigert, R.; Butler, L.M.; Brooks, D.A. Altered endosome biogenesis in prostate cancer has biomarker potential. *Mol. Cancer Res.* **2014**, *12*, 1851–1862.
175. Tsuchiya, N.; Izumiya, M.; Ogata-Kawata, H.; Okamoto, K.; Fujiwara, Y.; Nakai, M.; Okabe, A.; Schetter, A.J.; Bowman, E.D.; Midorikawa, Y.; *et al.* Tumor suppressor miR-22 determines p53-dependent cellular fate through post-transcriptional regulation of p21. *Cancer Res.* **2011**, *71*, 4628–4639.
176. Phin, S.; Moore, M.W.; Cotter, P.D. Genomic Rearrangements of PTEN in Prostate Cancer. *Front. Oncol.* **2013**, *3*, 240.
177. Shen, P.F.; Chen, X.Q.; Liao, Y.C.; Chen, N.; Zhou, Q.; Wei, Q.; Li, X.; Wang, J.; Zeng, H. MicroRNA-494-3p targets CXCR4 to suppress the proliferation, invasion, and migration of prostate cancer. *Prostate* **2014**, *74*, 756–767.
178. Wagner, S.; Ngezhahayo, A.; Escobar, H.M.; Nolte, I. Role of miRNA let-7 and its major targets in prostate cancer. *BioMed Res. Int.* **2014**, *2014*, 376326.
179. Takayama, K.; Suzuki, T.; Tsutsumi, S.; Fujimura, T.; Takahashi, S.; Homma, Y.; Urano, T.; Aburatani, H.; Inoue, S. Integrative analysis of FOXP1 function reveals a tumor-suppressive effect in prostate cancer. *Mol. Endocrinol.* **2014**, *28*, 2012–2024.
180. Pang, Y.; Young, C.Y.; Yuan, H. MicroRNAs and prostate cancer. *Acta Biochim. Biophys. Sin. (Shanghai)* **2010**, *42*, 363–369.
181. Fukuhara, H.; Kuramochi, M.; Fukami, T.; Kasahara, K.; Furuhashi, M.; Nobukuni, T.; Maruyama, T.; Gai, K.I.; Sekiya, T.; Shuin, T.; *et al.* Promoter methylation of TSLC1 and tumor suppression by its gene product in human prostate cancer. *Jpn. J. Cancer Res.* **2002**, *93*, 605–609.
182. Pesta, M.; Klecka, J.; Kulda, V.; Topolcan, O.; Hora, M.; Eret, V.; Ludvikova, M.; Babjuk, M.; Novak, K.; Stolz, J.; *et al.* Importance of miR-20a expression in prostate cancer tissue. *Anticancer Res.* **2010**, *30*, 3579–3583.
183. Cekaite, L.; Rantala, J.K.; Bruun, J.; Guriby, M.; Agesen, T.H.; Danielsen, S.A.; Lind, G.E.; Nesbakken, A.; Kallioniemi, L.; Lothe, R.A.; *et al.* MiR-9, -31, and -182 deregulation promote proliferation and tumor cell survival in colon cancer. *Neoplasia* **2012**, *14*, 868–879.
184. Meeh, P.F.; Farrell, C.L.; Croshaw, R.; Crimm, H.; Miller, S.K.; Oroian, D.; Kowli, S.; Zhu, J.; Carver, W.; Wu, W.; *et al.* A gene expression classifier of node-positive colorectal cancer. *Neoplasia* **2009**, *11*, 1074–1083.
185. Zhou, T.; Zhang, G.J.; Zhou, H.; Xiao, H.X.; Li, Y. Overexpression of microRNA-183 in human colorectal cancer and its clinical significance. *Eur. J. Gastroenterol. Hepatol.* **2014**, *26*, 229–233.
186. Nakamura, J.; Aoyagi, S.; Nanchi, I.; Nakatsuka, S.; Hirata, E.; Shibata, S.; Fukuda, M.; Yamamoto, Y.; Fukuda, I.; Tatsumi, N.; *et al.* Overexpression of eukaryotic elongation factor eEF2 in gastrointestinal cancers and its involvement in G2/M progression in the cell cycle. *Int. J. Oncol.* **2009**, *34*, 1181–1189.
187. Xu, X.M.; Qian, J.C.; Deng, Z.L.; Cai, Z.; Tang, T.; Wang, P.; Zhang, K.H.; Cai, J.P. Expression of miR-21, miR-31, miR-96 and miR-135b is correlated with the clinical parameters of colorectal cancer. *Oncol. Lett.* **2012**, *4*, 339–345.
188. Dong, Y.; Zhao, J.; Wu, C.W.; Zhang, L.; Liu, X.; Kang, W.; Leung, W.W.; Zhang, N.; Chan, F.K.; Sung, J.J.; *et al.* Tumor suppressor functions of miR-133a in colorectal cancer. *Mol. Cancer Res.* **2013**, *11*, 1051–1060.
189. Asbagh, L.A.; Vazquez, I.; Vecchione, L.; Budinska, E.; de Vriendt, V.; Baietti, M.F.; Steklov, M.; Jacobs, B.; Hoe, N.; Singh, S.; *et al.* The tyrosine phosphatase PTPRO sensitizes colon cancer cells to anti-EGFR therapy through activation of SRC-mediated EGFR signaling. *Oncotarget* **2014**, *5*, 10070–10083.
190. Smith, A.R.; Marquez, R.T.; Tsao, W.C.; Pathak, S.; Roy, A.; Ping, J.; Wilkerson, B.; Lan, L.; Meng, W.; Neufeld, L.; *et al.* Tumor suppressive microRNA-137 negatively regulates Musashi-1 and colorectal cancer progression. *Oncotarget* **2015**, *6*, 12558–12573.
191. Wang, F.; Ma, Y.L.; Zhang, P.; Shen, T.Y.; Shi, C.Z.; Yang, Y.Z.; Moyer, M.P.; Zhang, H.Z.; Chen, H.Q.; Liang, Y.; *et al.* SP1 mediates the link between methylation of the tumour suppressor miR-149 and outcome in colorectal cancer. *J. Pathol.* **2013**, *229*, 12–24.
192. Fan, J.; Yan, D.; Teng, M.; Tang, H.; Zhou, C.; Wang, X.; Li, D.; Qiu, G.; Peng, Z. Digital transcript profile analysis with aRNA-LongSAGE validates FERMT1 as a potential novel prognostic marker for colon cancer. *Clin. Cancer Res.* **2011**, *17*, 2908–2918.
193. Zhang, Q.; Tang, Q.; Qin, D.; Yu, L.; Huang, R.; Lv, G.; Zou, Z.; Jiang, X.C.; Zou, C.; Liu, W.; *et al.* Role of microRNA 30a targeting insulin receptor substrate 2 in colorectal tumorigenesis. *Mol. Cell. Biol.* **2015**, *35*, 988–1000.



194. Wang, R.J.; Wu, P.; Cai, G.X.; Wang, Z.M.; Xu, Y.; Peng, J.J.; Sheng, W.Q.; Lu, H.F.; Cai, S.J. Down-regulated MYH11 expression correlates with poor prognosis in stage II and III colorectal cancer. *Asian Pac. J. Cancer Prev.* **2014**, *15*, 7223–7228.
195. Arabzadeh, A.; Beauchemin, N. Stromal CEACAM1 expression regulates colorectal cancer metastasis. *Oncoimmunology* **2012**, *1*, 1205–1207.
196. Yu, F.; Yao, H.; Zhu, P.; Zhang, X.; Pan, Q.; Gong, C.; Huang, Y.; Hu, X.; Su, F.; Lieberman, J.; *et al.* let-7 regulates self renewal and tumorigenicity of breast cancer cells. *Cell* **2007**, *131*, 1109–1123.
197. Yu, K.; Lee, C.H.; Tan, P.H.; Tan, P. Conservation of breast cancer molecular subtypes and transcriptional patterns of tumor progression across distinct ethnic populations. *Clin. Cancer Res.* **2004**, *10*, 5508–5517.
198. Gebre-Medhin, M.; Kindblom, L.G.; Wennbo, H.; Tornell, J.; Meis-Kindblom, J.M. Growth hormone receptor is expressed in human breast cancer. *Am. J. Pathol.* **2001**, *158*, 1217–1222.
199. Gilbert, P.M.; Mouw, J.K.; Unger, M.A.; Lakins, J.N.; Gbeganon, M.K.; Clemmer, V.B.; Benezra, M.; Licht, D.; Boudreau, N.J.; Tsai, K.K.; *et al.* HOXA9 regulates BRCA1 expression to modulate human breast tumor phenotype. *J. Clin. Investig.* **2010**, *120*, 1535–1550.
200. Xue, J.; Chen, Z.; Gu, X.; Zhang, Y.; Zhang, W. MicroRNA-148a inhibits migration of breast cancer cells by targeting MMP-13. *Tumour Biol.* **2015**, *37*, 1581–1590.
201. Alkaied, H.; Harris, K.; Brenner, A.; Awasum, M.; Varma, S. Does hormonal therapy have a therapeutic role in metastatic primary small cell neuroendocrine breast carcinoma? Case report and literature review. *Clin. Breast Cancer* **2012**, *12*, 226–230.
202. Milde-Langosch, K.; Kappes, H.; Riethdorf, S.; Loning, T.; Bamberger, A.M. FosB is highly expressed in normal mammary epithelia, but down-regulated in poorly differentiated breast carcinomas. *Breast Cancer Res. Treat.* **2003**, *77*, 265–275.
203. Chiquet-Ehrismann, R.; Tucker, R.P. Tenascins and the importance of adhesion modulation. *Cold Spring Harb. Perspect. Biol.* **2011**, *3*, doi:10.1101/cshperspect.a004960.
204. Zhang, X.; Yu, H.; Lou, J.R.; Zheng, J.; Zhu, H.; Popescu, N.I.; Lupu, F.; Lind, S.E.; Ding, W.Q. MicroRNA-19 (miR-19) regulates tissue factor expression in breast cancer cells. *J. Biol. Chem.* **2011**, *286*, 1429–1435.
205. Kadota, M.; Sato, M.; Duncan, B.; Ooshima, A.; Yang, H.H.; Diaz-Meyer, N.; Gere, S.; Kageyama, S.; Fukuoka, J.; Nagata, T.; *et al.* Identification of novel gene amplifications in breast cancer and coexistence of gene amplification with an activating mutation of PIK3CA. *Cancer Res.* **2009**, *69*, 7357–7365.
206. Sun, Y.; Mao, X.; Fan, C.; Liu, C.; Guo, A.; Guan, S.; Jin, Q.; Li, B.; Yao, F.; Jin, F. CXCL12-CXCR4 axis promotes the natural selection of breast cancer cell metastasis. *Tumour Biol.* **2014**, *35*, 7765–7773.
207. Planche, A.; Bacac, M.; Provero, P.; Fusco, C.; Delorenzi, M.; Stehle, J.C.; Stamenkovic, I. Identification of prognostic molecular features in the reactive stroma of human breast and prostate cancer. *PLoS ONE* **2011**, *6*, e18640.
208. Yan, L.X.; Huang, X.F.; Shao, Q.; Huang, M.Y.; Deng, L.; Wu, Q.L.; Zeng, Y.X.; Shao, J.Y. MicroRNA miR-21 overexpression in human breast cancer is associated with advanced clinical stage, lymph node metastasis and patient poor prognosis. *RNA* **2008**, *14*, 2348–2360.
209. Li, X.; Liu, X.; Xu, W.; Zhou, P.; Gao, P.; Jiang, S.; Lobie, P.E.; Zhu, T. c-MYC-regulated miR-23a/24-2/27a cluster promotes mammary carcinoma cell invasion and hepatic metastasis by targeting Sprouty2. *J. Biol. Chem.* **2013**, *288*, 18121–18133.
210. Bernemann, C.; Hulsewig, C.; Ruckert, C.; Schafer, S.; Blumel, L.; Hempel, G.; Gotte, M.; Greve, B.; Barth, P.J.; Kiesel, L.; *et al.* Influence of secreted frizzled receptor protein 1 (SFRP1) on neoadjuvant chemotherapy in triple negative breast cancer does not rely on WNT signaling. *Mol. Cancer* **2014**, *13*, 174.
211. Du, W.W.; Fang, L.; Li, M.; Yang, X.; Liang, Y.; Peng, C.; Qian, W.; O'Malley, Y.Q.; Askeland, R.W.; Sugg, S.L.; *et al.* MicroRNA miR-24 enhances tumor invasion and metastasis by targeting PTPN9 and PTPRF to promote EGF signaling. *J. Cell Sci.* **2013**, *126 Pt 6*, 1440–1453.
212. Faget, J.; Sisirak, V.; Blay, J.Y.; Caux, C.; Bendriss-Vermare, N.; Menetrier-Caux, C. ICOS is associated with poor prognosis in breast cancer as it promotes the amplification of immunosuppressive CD4(+) T cells by plasmacytoid dendritic cells. *Oncoimmunology* **2013**, *2*, e23185.
213. Sreenath, A.S.; Kumar, K.R.; Reddy, G.V.; Sreedevi, B.; Praveen, D.; Monika, S.; Sudha, S.; Reddy, M.G.; Reddanna, P. Evidence for the association of synaptotagmin with glutathione S-transferases: Implications for a novel function in human breast cancer. *Clin. Biochem.* **2005**, *38*, 436–443.

214. Gu, Y.; Li, P.; Peng, F.; Zhang, M.; Zhang, Y.; Liang, H.; Zhao, W.; Qi, L.; Wang, H.; Wang, C.; *et al.* Autophagy-related prognostic signature for breast cancer. *Mol. Carcinog.* **2016**, *55*, 292–299.
215. Kovacevic, Z.; Fu, D.; Richardson, D.R. The iron-regulated metastasis suppressor, Ndr-1: Identification of novel molecular targets. *Biochim. Biophys. Acta* **2008**, *1783*, 1981–1992.
216. Cormier, K.A.; Fournier, S.; O'Brien, J.; Tessier, P.; Robichaud, G.A. Role of s100a8 and s100a9 proteins on breast cancer aggressivity. *FASEB J.* **2009**, *23*, LB276.
217. Akhavantabasi, S.; Sapmaz, A.; Tuna, S.; Erson-Bensan, A.E. miR-125b targets ARID3B in breast cancer cells. *Cell Struct. Funct.* **2012**, *37*, 27–38.
218. Song, H.; Wu, C.; Wei, C.; Li, D.; Hua, K.; Song, J.; Xu, H.; Chen, L.; Fang, L. Silencing of DUSP6 gene by RNAi-mediation inhibits proliferation and growth in MDA-MB-231 breast cancer cells: An in vitro study. *Int. J. Clin. Exp. Med.* **2015**, *8*, 10481–10490.
219. Fang, W.B.; Jokar, I.; Zou, A.; Lambert, D.; Dendukuri, P.; Cheng, N. CCL2/CCR2 chemokine signaling coordinates survival and motility of breast cancer cells through Smad3 protein- and p42/44 mitogen-activated protein kinase (MAPK)-dependent mechanisms. *J. Biol. Chem.* **2012**, *287*, 36593–36608.
220. Sanchez-Barrena, M.J.; Vallis, Y.; Clatworthy, M.R.; Doherty, G.J.; Veprintsev, D.B.; Evans, P.R.; McMahon, H.T. Bin2 is a membrane sculpting N-BAR protein that influences leucocyte podosomes, motility and phagocytosis. *PLoS ONE* **2012**, *7*, e52401.
221. Campone, M.; Valo, I.; Jezequel, P.; Moreau, M.; Boissard, A.; Champion, L.; Loussouarn, D.; Verrielle, V.; Coqueret, O.; Guette, C. Prediction of Recurrence and Survival for Triple-Negative Breast Cancer (TNBC) by a Protein Signature in Tissue Samples. *Mol. Cell. Proteom.* **2015**, *14*, 2936–2946.
222. Qie, S.; Chu, C.; Li, W.; Wang, C.; Sang, N. ErbB2 activation upregulates glutaminase 1 expression which promotes breast cancer cell proliferation. *J. Cell. Biochem.* **2014**, *115*, 498–509.
223. Yan, X.; Chen, X.; Liang, H.; Deng, T.; Chen, W.; Zhang, S.; Liu, M.; Gao, X.; Liu, Y.; Zhao, C.; *et al.* miR-143 and miR-145 synergistically regulate ERBB3 to suppress cell proliferation and invasion in breast cancer. *Mol. Cancer* **2014**, *13*, 220.
224. Feng, Q.; Zhang, Z.; Shea, M.J.; Creighton, C.J.; Coarfa, C.; Hilsenbeck, S.G.; Lanz, R.; He, B.; Wang, L.; Fu, X.; *et al.* An epigenomic approach to therapy for tamoxifen-resistant breast cancer. *Cell Res.* **2014**, *24*, 809–819.
225. Friedrichs, K.; Ruiz, P.; Franke, F.; Gille, I.; Terpe, H.J.; Imhof, B.A. High expression level of alpha 6 integrin in human breast carcinoma is correlated with reduced survival. *Cancer Res.* **1995**, *55*, 901–906.
226. Adem, C.; Soderberg, C.L.; Hafner, K.; Reynolds, C.; Slezak, J.M.; Sinclair, C.S.; Sellers, T.A.; Schaid, D.J.; Couch, F.; Hartmann, L.C.; *et al.* ERBB2, TBX2, RPS6KB1, and MYC alterations in breast tissues of BRCA1 and BRCA2 mutation carriers. *Genes Chromosomes Cancer* **2004**, *41*, 1–11.
227. Stephens, P.J.; McBride, D.J.; Lin, M.L.; Varela, I.; Pleasance, E.D.; Simpson, J.T.; Stebbings, L.A.; Edkins, S.; Mudie, L.J.; Greenman, C.D.; *et al.* Complex landscapes of somatic rearrangement in human breast cancer genomes. *Nature* **2009**, *462*, 1005–1010.
228. Pandey, A.K.; Zhang, Y.; Zhang, S.; Li, Y.; Tucker-Kellogg, G.; Yang, H.; Jha, S. TIP60-miR-22 axis as a prognostic marker of breast cancer progression. *Oncotarget* **2015**, *6*, 41290–41306.
229. Pennanen, P.T.; Sarvilinna, N.S.; Toimela, T.; Ylikomi, T.J. Inhibition of FOSL1 overexpression in antiestrogen-resistant MCF-7 cells decreases cell growth and increases vacuolization and cell death. *Steroids* **2011**, *76*, 1063–1068.
